# Supplementary material for: The malignant phenotype in breast cancer is driven by eIF4A1-mediated changes in the translational landscape
Source: PubMed Central journal article supplement (PMC4669741; doi:10.1038/cddis.2014.542), 2015-01-22
Supplement: cddis2014542x1.pdf [file cddis2014542x1.pdf]

## Supplementary Figure 1

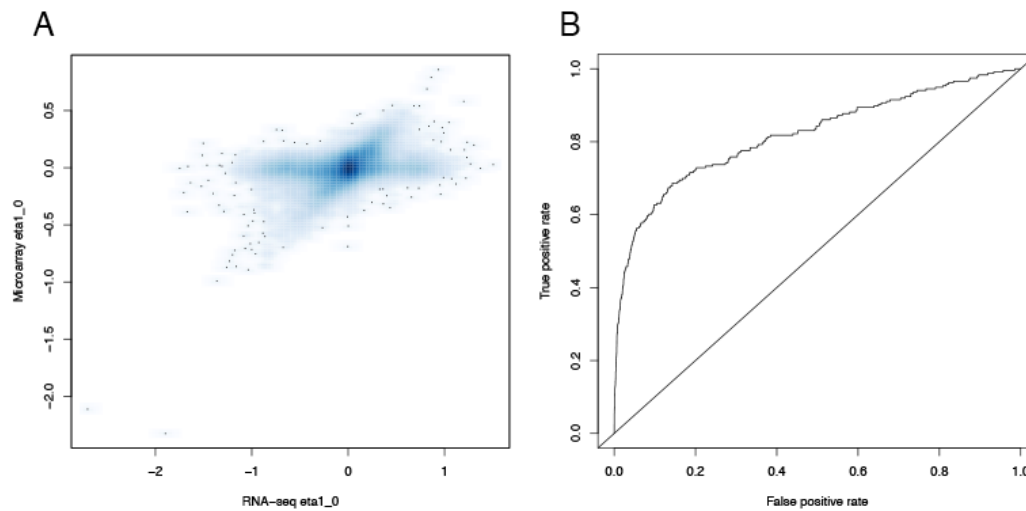

### Supplementary Figure 1. Correlation of RNASeq and microarray data

(A) Scatterplot comparing eta1\_0 (the calculated shift between polysomal and subpolysomal fractions) as derived from microarray and RNASeq data. The horizontal smear around microarray eta1\_0=0 indicates numerous low-abundance mRNAs that are poorly resolved by microarray but which show larger changes in the RNASeq data.

(B) Receiver Operator Characteristic (ROC) curve of microarray vs RNASeq results thresholded at a posterior probability of 20% (taken as 'ground truth'). The area under the curve is 72.5%.

**Supplementary Figure 2**

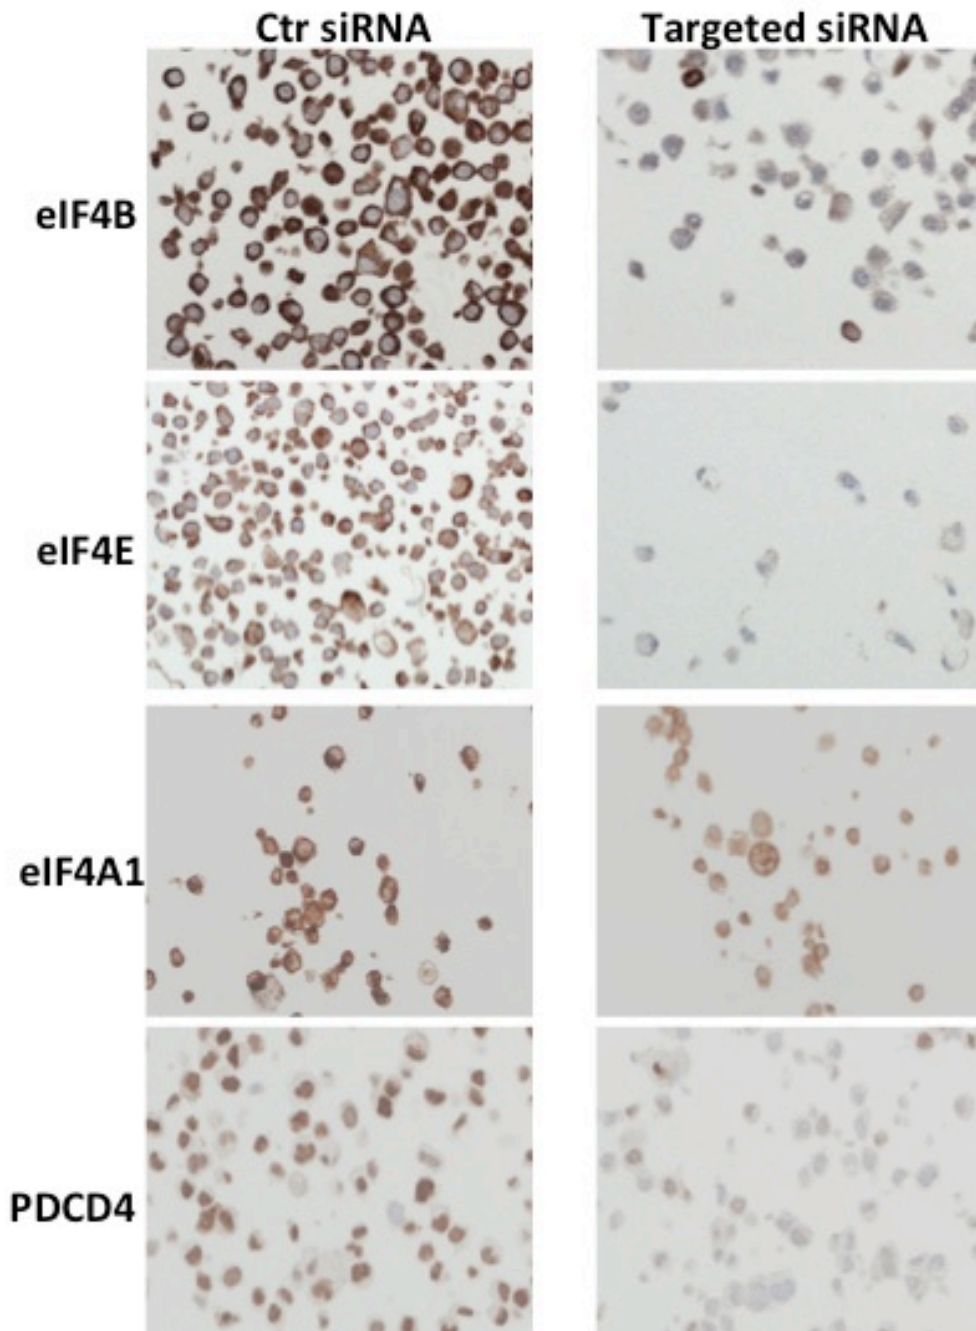

**Supplementary Figure 2.** Loss of immunohistochemical positivity in siRNA-treated cells demonstrates the specificity of the antibody assays. MCF7 cells were treated with respective siRNAs, collected and prepared as cytoblocks and immunohistochemical assays were performed.

**Supplementary Figure 3.**

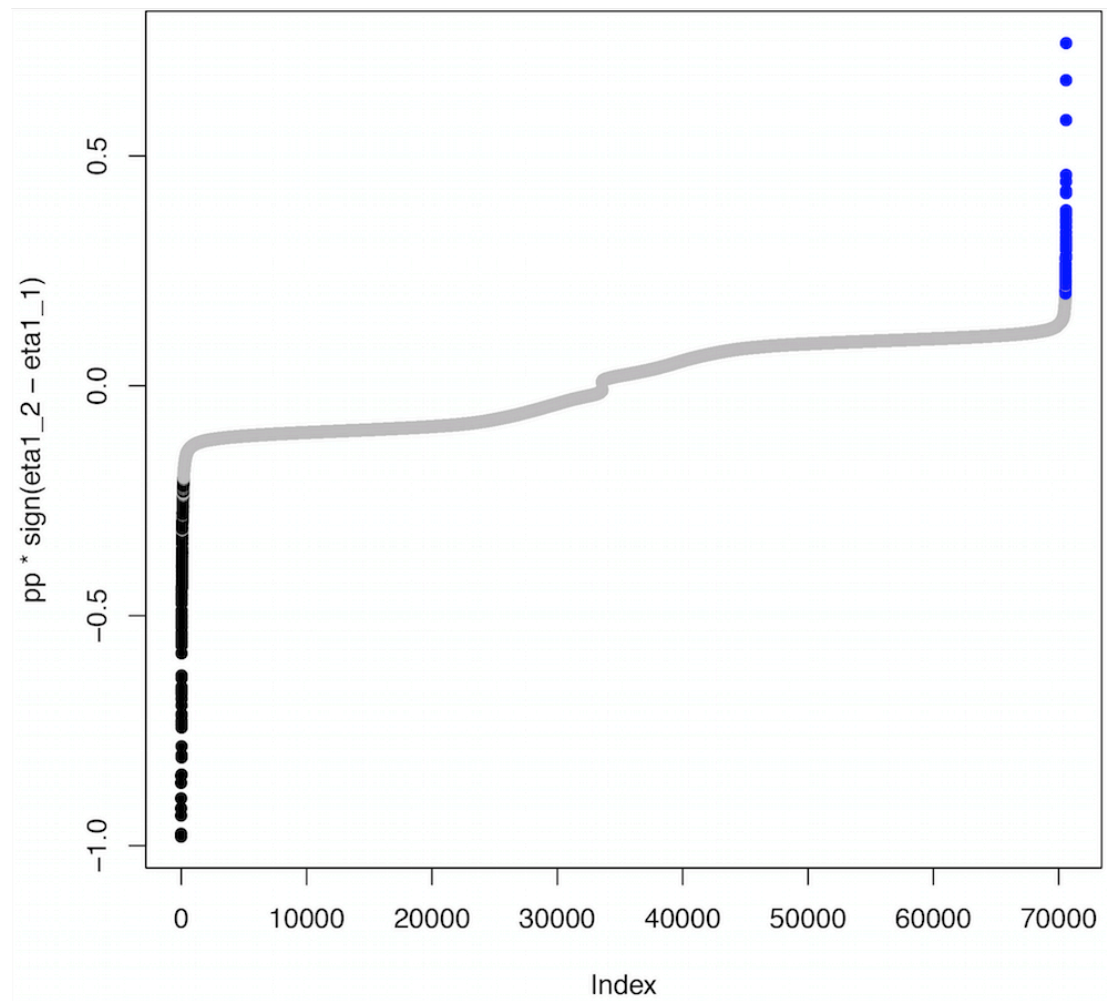

**Supplementary Figure 3.** Ranked list of eIF4A1-dependent and -independent mRNAs. eIF4A1-dependent messages are shown as black spots, and eIF4A1-independent mRNAs are in blue.
