# Supplementary material for: The malignant phenotype in breast cancer is driven by eIF4A1-mediated changes in the translational landscape
Source: PubMed Central journal article supplement (PMC4669741; doi:10.1038/cddis.2014.542), 2015-01-22
Supplement: cddis2014542x2.pdf [file cddis2014542x2.pdf]

**Supplementary Table 1.** Summary of immunohistochemical data. Percentage proportions within each variable are shown in parentheses.

|                 |              | eIF4E   | eIF4A1  | eIF4B   | PDCD4(nuc) | PDCD4(cyt) |
|-----------------|--------------|---------|---------|---------|------------|------------|
| Intensity score | 0 (Negative) | 206(11) | 243(11) | 289(18) | 783(28)    | 671(33)    |
|                 | 1 (Weak)     | 666(35) | 928(40) | 612(39) | 1197(29)   | 689(51)    |
|                 | 2 (Moderate) | 736(39) | 914(39) | 679(43) | 337(27)    | 632(14)    |
|                 | 3 (Strong)   | 302(16) | 236(10) | -       | 46(16)     | 371(2)     |
| No of arrays    |              | 20      | 23      | 18      | 24         | 24         |
| Total cores     |              | 3265    | 3724    | 2911    | 3903       | 3903       |
| Missing data    |              | 1355    | 1421    | 1331    | 1540       | 1540       |

**Supplementary Table 2.** Univariate survival models. Variables reaching nominal significance (P<0.05) are shown in bold.

| Variable    | ER negative disease |                      |                  |                      |              | ER positive disease |                      |                  |
|-------------|---------------------|----------------------|------------------|----------------------|--------------|---------------------|----------------------|------------------|
|             | n                   | HR (95% CI)          | P                | T (95% CI)           | P            | n                   | HR (95% CI)          | P                |
| Grade       | 683                 | 1.3 (1.0-1.7)        | 0.078            | -                    | -            | <b>2047</b>         | <b>2.2 (1.8-2.8)</b> | <b>&lt;0.001</b> |
| Nodes       | <b>712</b>          | <b>2.6 (2.1-3.2)</b> | <b>&lt;0.001</b> | -                    | -            | <b>2096</b>         | <b>2.8 (2.4-3.3)</b> | <b>&lt;0.001</b> |
| Size        | <b>717</b>          | <b>1.8 (1.2-2.3)</b> | <b>&lt;0.001</b> | -                    | -            | <b>2200</b>         | <b>2.3 (1.8-2.8)</b> | <b>&lt;0.001</b> |
| HER2        | <b>651</b>          | <b>1.5 (1.1-2.2)</b> | <b>0.026</b>     | -                    | -            | <b>2038</b>         | <b>2.3 (1.6-3.3)</b> | <b>&lt;0.001</b> |
| AURORAK     | 529                 | 1.0 (0.9-1.2)        | 0.736            | -                    | -            | <b>1576</b>         | <b>1.6 (1.4-1.9)</b> | <b>&lt;0.001</b> |
| eIF4E       | <b>453</b>          | <b>1.3 (1.0-1.6)</b> | <b>0.045</b>     | -                    | -            | 1274                | 0.9 (0.8-1.1)        | 0.551            |
| eIF4A1      | <b>551</b>          | <b>1.8 (1.1-3.0)</b> | <b>0.017</b>     | <b>0.7 (0.5-1.0)</b> | <b>0.027</b> | 1575                | 1.2 (0.6-2.4)        | 0.533            |
| eIF4B       | <b>394</b>          | <b>1.5 (1.1-2.1)</b> | <b>0.008</b>     | -                    | -            | 1037                | 1.0 (0.8-1.2)        | 0.841            |
| PDCD4 (cyt) | 558                 | 0.9 (0.7-1.2)        | 0.392            | -                    | -            | <b>1584</b>         | <b>0.6 (0.5-0.8)</b> | <b>&lt;0.001</b> |
| PDCD4 (nuc) | 558                 | 1.0 (0.8-1.3)        | 0.756            | -                    | -            | <b>1584</b>         | <b>0.6 (0.5-0.7)</b> | <b>&lt;0.001</b> |

**Supplementary Table 3.** Correlations between translation initiation factors and oestrogen receptor expression. Correlations with a significance <0.01 are shown in bold.

|                | eIF4E       | eIF4A1       | eIF4B       | PDCD4<br>(cyt) | PDCD4<br>(nuc) | ER |
|----------------|-------------|--------------|-------------|----------------|----------------|----|
| eIF4E          | -           |              |             |                |                |    |
| eIF4A1         | <b>0.31</b> | -            |             |                |                |    |
| eIF4B          | <b>0.33</b> | <b>0.34</b>  | -           |                |                |    |
| PDCD4<br>(cyt) | <b>0.13</b> | <b>0.17</b>  | <b>0.11</b> | -              |                |    |
| PDCD4<br>(nuc) | <b>0.10</b> | <b>0.13</b>  | <b>0.13</b> | <b>0.41</b>    | -              |    |
| ER             | 0.03        | <b>-0.13</b> | 0.06        | <b>0.11</b>    | <b>0.35</b>    | -  |

**Supplementary Table 4A.** Associations between markers and clinicopathological data within the type of disease (ER-positive or ER-negative) in which the marker has prognostic value. Correlations reaching nominal significance (P<0.05) are shown in bold. Starred values refer to Fisher's exact test (cell values<5); all other P-values are chi-squared tests.

|                  | eIF4E   |        | ER Negative cases<br>eIF4A1 |                | eIF4B          |                | ER Positive cases<br>PDCD4(nuc) |                | PDCD4(cyt)     |                |
|------------------|---------|--------|-----------------------------|----------------|----------------|----------------|---------------------------------|----------------|----------------|----------------|
|                  | Low     | High   | Low                         | High           | Low            | High           | Low                             | High           | Low            | High           |
| Age at diagnosis |         |        |                             |                |                |                |                                 |                |                |                |
| ≤55              | 263(71) | 61(75) | 35(81)                      | 353(70)        | 178(78)        | 114(69)        | 215(64)                         | 748(60)        | 288(60)        | 675(61)        |
| >55              | 109(29) | 20(25) | 8(19)                       | 155(31)        | 51(22)         | 51(31)         | 122(36)                         | 499(40)        | 196(41)        | 425(39)        |
| P-value          | 0.405   |        | 0.118*                      |                | 0.053          |                | 0.203                           |                | 0.485          |                |
| Tumour type      |         |        |                             |                |                |                |                                 |                |                |                |
| Ductal           | 324(87) | 69(85) | 36(84)                      | 443(87)        | 188(82)        | 141(86)        | 263(78)                         | 911(73)        | <b>341(71)</b> | <b>833(76)</b> |
| Lobular          | 13(4)   | 4(5)   | 4(9)                        | 18(4)          | 12(5)          | 7(4)           | 47(14)                          | 208(17)        | <b>99(21)</b>  | <b>156(14)</b> |
| Other            | 35(9)   | 8(10)  | 3(7)                        | 46(9)          | 29(13)         | 17(10)         | 27(8)                           | 127(10)        | <b>44(9)</b>   | <b>110(10)</b> |
| P-value          | 0.712*  |        | 0.175*                      |                | 0.716*         |                | 0.182                           |                | <b>0.008</b>   |                |
| Grade            |         |        |                             |                |                |                |                                 |                |                |                |
| 1                | 19(6)   | 5(7)   | <b>8(21)</b>                | <b>18(4)</b>   | <b>12(6)</b>   | <b>5(3)</b>    | <b>58(20)</b>                   | <b>282(25)</b> | 102(24)        | 238(24)        |
| 2                | 82(24)  | 20(28) | <b>11(28)</b>               | <b>115(25)</b> | <b>67(34)</b>  | <b>30(20)</b>  | <b>145(49)</b>                  | <b>632(56)</b> | 228(54)        | 549(55)        |
| 3                | 241(71) | 47(65) | <b>20(51)</b>               | <b>319(71)</b> | <b>118(60)</b> | <b>115(77)</b> | <b>93(31)</b>                   | <b>220(19)</b> | 95(22)         | 218(22)        |
| P-value          | 0.652*  |        | <b>&lt;0.001*</b>           |                | <b>0.004*</b>  |                | <b>&lt;0.001</b>                |                | 0.939          |                |
| Node Status      |         |        |                             |                |                |                |                                 |                |                |                |
| Negative         | 190(55) | 35(47) | 20(54)                      | 248(52)        | 109(51)        | 87(56)         | <b>166(53)</b>                  | <b>730(64)</b> | 259(59)        | 637(63)        |
| Positive         | 154(45) | 40(53) | 17(46)                      | 226(48)        | 106(49)        | 68(44)         | <b>146(47)</b>                  | <b>411(36)</b> | 183(41)        | 374(37)        |

|               |         |        |        |         |                |               |                |                |         |         |
|---------------|---------|--------|--------|---------|----------------|---------------|----------------|----------------|---------|---------|
| P-value       | 0.178   |        | 0.839  |         | 0.302          |               | <b>0.001</b>   |                | 0.112   |         |
| Tumour Size   |         |        |        |         |                |               |                |                |         |         |
| <20 mm        | 140(40) | 27(35) | 20(50) | 198(42) | <b>94(44)</b>  | <b>63(40)</b> | <b>157(49)</b> | <b>735(61)</b> | 281(61) | 611(58) |
| 20-49 mm      | 198(56) | 47(61) | 19(48) | 257(54) | <b>107(50)</b> | <b>90(58)</b> | <b>153(48)</b> | <b>437(36)</b> | 168(36) | 422(40) |
| ≥50 mm        | 13(4)   | 3(4)   | 1(3)   | 21(4)   | <b>15(7)</b>   | <b>3(2)</b>   | <b>10(3)</b>   | <b>34(3)</b>   | 14(3)   | 30(3)   |
| P-value       | 0.740*  |        | 0.641* |         | <b>0.044*</b>  |               | <b>0.001*</b>  |                | 0.452   |         |
| HER2 Status   |         |        |        |         |                |               |                |                |         |         |
| Negative      | 275(81) | 55(72) | 35(85) | 357(78) | 170(79)        | 117(81)       | 286(88)        | 1055(91)       | 394(88) | 947(91) |
| Positive      | 65(19)  | 21(28) | 6(15)  | 103(22) | 46(21)         | 27(19)        | 39(12)         | 102(9)         | 52(12)  | 89(9)   |
| P-value       | 0.098   |        | 0.324* |         | 0.556          |               | 0.084          |                | 0.065   |         |
| Aurora Kinase |         |        |        |         |                |               |                |                |         |         |
| Negative      | 72(27)  | 13(20) | 10(29) | 79(21)  | <b>47(28)</b>  | <b>16(16)</b> | 97(35)         | 295(31)        | 126(34) | 266(31) |
| Positive      | 200(74) | 51(80) | 24(71) | 295(79) | <b>124(73)</b> | <b>84(84)</b> | 183(65)        | 649(69)        | 250(67) | 582(69) |
| P-value       | 0.308   |        | 0.263  |         | <b>0.031</b>   |               | 0.285          |                | 0.459   |         |

**Supplementary Table 4B.** Remaining associations between markers and clinicopathological data (i.e. in the disease type lacking prognostic value for the variable).

|                  | ER Positive cases |                |                  |                 |                |                | ER Negative cases |                |            |         |
|------------------|-------------------|----------------|------------------|-----------------|----------------|----------------|-------------------|----------------|------------|---------|
|                  | eIF4E             |                | eIF4A1           |                 | eIF4B          |                | PDCD4(nuc)        |                | PDCD4(cyt) |         |
|                  | Low               | High           | Low              | High            | Low            | High           | Low               | High           | Low        | High    |
| Age at diagnosis |                   |                |                  |                 |                |                |                   |                |            |         |
| ≤55              | 634(59)           | 130(65)        | 98(55)           | 860(62)         | 385(66)        | 295(65)        | <b>187(68)</b>    | <b>215(77)</b> | 167(74)    | 235(71) |
| >55              | 439(41)           | 71(35)         | 79(45)           | 539(39)         | 201(34)        | 156(35)        | <b>90(33)</b>     | <b>66(24)</b>  | 59(26)     | 97(29)  |
| P-value          | 0.138             |                | 0.117            |                 | 0.923          |                | <b>0.018</b>      |                | 0.422      |         |
| Tumour type      |                   |                |                  |                 |                |                |                   |                |            |         |
| Ductal           | <b>777(73)</b>    | <b>169(84)</b> | <b>120(68)</b>   | <b>1054(75)</b> | <b>418(72)</b> | <b>341(76)</b> | 239(86)           | 233(83)        | 195(86)    | 277(83) |
| Lobular          | <b>188(18)</b>    | <b>19(10)</b>  | <b>42(24)</b>    | <b>209(15)</b>  | <b>121(21)</b> | <b>67(15)</b>  | 10(4)             | 20(7)          | 9(4)       | 21(6)   |
| Other            | <b>107(10)</b>    | <b>13(7)</b>   | <b>15(9)</b>     | <b>135(10)</b>  | <b>46(8)</b>   | <b>42(9)</b>   | 28(10)            | 28(10)         | 22(10)     | 34(10)  |
| P-value          | <b>0.002</b>      |                | <b>0.011</b>     |                 | <b>0.05</b>    |                | 0.195*            |                | 0.483*     |         |
| Grade            |                   |                |                  |                 |                |                |                   |                |            |         |
| 1                | <b>239(25)</b>    | <b>36(20)</b>  | <b>52(33)</b>    | <b>276(22)</b>  | 129(25)        | 99(24)         | 15(6)             | 9(4)           | 11(6)      | 13(5)   |
| 2                | <b>541(56)</b>    | <b>88(49)</b>  | <b>87(55)</b>    | <b>699(55)</b>  | 287(55)        | 211(52)        | 64(25)            | 69(29)         | 51(25)     | 82(28)  |
| 3                | <b>192(20)</b>    | <b>54(30)</b>  | <b>18(12)</b>    | <b>294(23)</b>  | 103(20)        | 97(24)         | 173(69)           | 162(68)        | 139(69)    | 196(67) |
| P-value          | <b>0.006</b>      |                | <b>&lt;0.001</b> |                 | 0.331          |                | 0.420*            |                | 0.723      |         |
| Node Status      |                   |                |                  |                 |                |                |                   |                |            |         |
| Negative         | 618(62)           | 111(61)        | 104(64)          | 797(62)         | 330(62)        | 255(61)        | 137(52)           | 150(58)        | 119(58)    | 168(53) |
| Positive         | 377(38)           | 71(39)         | 59(36)           | 495(38)         | 205(38)        | 163(39)        | 127(48)           | 109(42)        | 88(43)     | 148(47) |
| P-value          | 0.774             |                | 0.6              |                 | 0.831          |                | 0.167             |                | 0.331      |         |

|               |                |                |                   |                 |                  |                |                |                |                  |                |
|---------------|----------------|----------------|-------------------|-----------------|------------------|----------------|----------------|----------------|------------------|----------------|
| Tumour Size   |                |                |                   |                 |                  |                |                |                |                  |                |
| <20 mm        | 593(58)        | 109(55)        | <b>93(55)</b>     | <b>792(59)</b>  | <b>289(52)</b>   | <b>271(63)</b> | <b>92(35)</b>  | <b>127(48)</b> | 91(44)           | 128(40)        |
| 20-49 mm      | 415(40)        | 81(41)         | <b>75(45)</b>     | <b>516(38)</b>  | <b>256(46)</b>   | <b>152(35)</b> | <b>153(59)</b> | <b>129(49)</b> | 107(52)          | 175(55)        |
| ≥50 mm        | 24(2)          | 7(4)           | <b>0(0)</b>       | <b>42(3)</b>    | <b>13(2)</b>     | <b>9(2)</b>    | <b>16(6)</b>   | <b>7(3)</b>    | 9(4)             | 14(4)          |
| P-value       | 0.507*         |                | <b>0.013*</b>     |                 | <b>0.002*</b>    |                | <b>0.004*</b>  |                | 0.756*           |                |
| HER2 Status   |                |                |                   |                 |                  |                |                |                |                  |                |
| Negative      | <b>957(93)</b> | <b>173(89)</b> | <b>161(98)</b>    | <b>1194(90)</b> | 513(92)          | 379(88)        | 186(75)        | 192(80)        | <b>128(68)</b>   | <b>250(84)</b> |
| Positive      | <b>69(7)</b>   | <b>21(11)</b>  | <b>3(2)</b>       | <b>135(10)</b>  | 47(8)            | 51(12)         | 62(25)         | 47(20)         | <b>61(32)</b>    | <b>48(16)</b>  |
| P-value       | <b>0.045</b>   |                | <b>&lt;0.001*</b> |                 | 0.07             |                | 0.158          |                | <b>&lt;0.001</b> |                |
| Aurora Kinase |                |                |                   |                 |                  |                |                |                |                  |                |
| Negative      | 298(37)        | 41(29)         | <b>77(54)</b>     | <b>333(32)</b>  | <b>179(40)</b>   | <b>69(26)</b>  | 56(26)         | 39(19)         | 42(25)           | 53(21)         |
| Positive      | 519(64)        | 102(71)        | <b>65(46)</b>     | <b>720(68)</b>  | <b>268(60)</b>   | <b>198(74)</b> | 161(74)        | 166(81)        | 127(75)          | 200(79)        |
| P-value       | 0.072          |                | <b>&lt;0.001</b>  |                 | <b>&lt;0.001</b> |                | 0.095          |                | 0.347            |                |

**Supplementary Table 5.** eIF4A1-dependent and independent transcripts. eta1\_1 is an estimate of the log fold change between subpolysomal fractions (siRNA vs ctrl) and eta1\_2 is an estimate of the log fold change between polysomal fractions. Thresholding based on the posterior probability >0.2 was applied.

**eIF4A1-dependent transcripts**

| No | Transcript ID   | Gene name | Bayes factor | Posterior probability | eta1_1 | eta1_2 |
|----|-----------------|-----------|--------------|-----------------------|--------|--------|
| 1  | ENST00000309340 | MKNK2     | 430.88       | 0.98                  | 0.74   | -0.21  |
| 2  | ENST00000264645 | CASC3     | 338.08       | 0.97                  | 1.07   | 0.26   |
| 3  | ENST00000439930 | PCBP2     | 128.08       | 0.93                  | 0.63   | -0.26  |
| 4  | ENST00000546463 | PCBP2     | 102.22       | 0.92                  | 0.55   | -0.28  |
| 5  | ENST00000371085 | GNAS      | 78.28        | 0.90                  | 0.48   | -0.15  |
| 6  | ENST00000337979 | STX3      | 56.83        | 0.86                  | 0.57   | -0.26  |
| 7  | ENST00000373910 | UBE2D1    | 49.91        | 0.85                  | -0.51  | -1.58  |
| 8  | ENST00000279101 | CABLES2   | 49.02        | 0.84                  | 0.00   | -0.49  |
| 9  | ENST00000439880 | CDC25B    | 37.73        | 0.81                  | 1.38   | 0.44   |
| 10 | ENST00000265620 | GNAS      | 36.82        | 0.80                  | 0.54   | -0.13  |
| 11 | ENST00000350356 | PRKACA    | 32.66        | 0.78                  | 1.16   | 0.00   |
| 12 | ENST00000250930 | TMEM8A    | 26.05        | 0.74                  | 0.51   | -0.16  |
| 13 | ENST00000237654 | CCNI      | 25.28        | 0.74                  | 0.63   | -0.15  |
| 14 | ENST00000308595 | ADRBK1    | 25.18        | 0.74                  | 1.02   | 0.23   |
| 15 | ENST00000262891 | MARK4     | 24.37        | 0.73                  | 0.64   | 0.05   |
| 16 | ENST00000318445 | SLCO3A1   | 24.08        | 0.73                  | 1.11   | -0.02  |
| 17 | ENST00000320580 | PACS1     | 22.71        | 0.72                  | 1.04   | 0.29   |
| 18 | ENST00000242783 | PKN1      | 22.44        | 0.71                  | 0.88   | 0.03   |
| 19 | ENST00000225394 | GIT1      | 20.48        | 0.69                  | 1.21   | 0.33   |



|    |                 |          |       |      |       |       |
|----|-----------------|----------|-------|------|-------|-------|
| 20 | ENST00000377724 | DCAF10   | 19.18 | 0.68 | 1.73  | -0.22 |
| 21 | ENST00000260600 | ADCY3    | 18.20 | 0.67 | 1.00  | 0.12  |
| 22 | ENST00000313578 | AQP11    | 17.98 | 0.67 | 0.60  | -0.26 |
| 23 | ENST00000336395 | TESK1    | 17.76 | 0.66 | 0.81  | -0.02 |
| 24 | ENST00000290649 | AMFR     | 17.51 | 0.66 | 0.57  | -0.13 |
| 25 | ENST00000340833 | CDC25B   | 17.40 | 0.66 | 1.72  | 0.45  |
| 26 | ENST00000242209 | FKBP9    | 17.12 | 0.66 | 0.55  | 0.00  |
| 27 | ENST00000453954 | TCF3     | 15.66 | 0.64 | 0.83  | 0.08  |
| 28 | ENST00000323469 | DIRAS1   | 15.27 | 0.63 | 0.38  | -0.39 |
| 29 | ENST00000323064 | AGBL5    | 12.49 | 0.58 | 0.11  | -0.51 |
| 30 | ENST00000258530 | APPL2    | 11.69 | 0.57 | 0.64  | 0.02  |
| 31 | ENST00000374142 | ZDHHC18  | 11.39 | 0.56 | 0.66  | 0.20  |
| 32 | ENST00000415496 | MGRN1    | 11.23 | 0.56 | 0.98  | 0.00  |
| 33 | ENST00000339157 | ABHD12   | 10.88 | 0.55 | 0.64  | 0.02  |
| 34 | ENST00000261739 | ANKRD13A | 10.59 | 0.54 | 0.90  | 0.11  |
| 35 | ENST00000415914 | THAP5    | 10.41 | 0.54 | -0.07 | -0.79 |
| 36 | ENST00000306090 | GNAS     | 9.96  | 0.53 | 0.52  | -0.14 |
| 37 | ENST00000372591 | FOXO6    | 9.88  | 0.52 | 0.98  | 0.13  |
| 38 | ENST00000246548 | UBA2     | 9.59  | 0.52 | 0.93  | 0.19  |
| 39 | ENST00000389167 | GPS2     | 9.49  | 0.51 | 1.09  | 0.26  |
| 40 | ENST00000552819 | PCBP2    | 9.15  | 0.50 | 0.47  | -0.33 |
| 41 | ENST00000367103 | MAPKAPK2 | 9.05  | 0.50 | 0.78  | 0.17  |
| 42 | ENST00000322030 | SET      | 8.96  | 0.50 | 0.46  | -0.12 |
| 43 | ENST00000310496 | RFNG     | 8.61  | 0.49 | 0.72  | 0.04  |
| 44 | ENST00000319562 | FARP1    | 8.10  | 0.47 | 0.33  | -0.37 |
| 45 | ENST00000376572 | KIAA2013 | 7.76  | 0.46 | 0.52  | -0.16 |
| 46 | ENST00000381334 | TMEM165  | 7.59  | 0.46 | 0.68  | 0.03  |
| 47 | ENST00000258796 | TTYH3    | 7.49  | 0.45 | 0.25  | -0.47 |

|    |                 |         |      |      |       |       |
|----|-----------------|---------|------|------|-------|-------|
| 48 | ENST00000260403 | TMEM62  | 7.47 | 0.45 | 0.88  | 0.17  |
| 49 | ENST00000534680 | C8orf82 | 7.16 | 0.44 | 0.46  | -0.29 |
| 50 | ENST00000422318 | NT5DC2  | 7.09 | 0.44 | 0.35  | -0.32 |
| 51 | ENST00000313601 | GNAI2   | 7.06 | 0.44 | 0.73  | -0.14 |
| 52 | ENST00000382998 | CTIF    | 7.00 | 0.44 | 0.42  | -0.88 |
| 53 | ENST00000372991 | CCND3   | 6.98 | 0.44 | 1.05  | 0.22  |
| 54 | ENST00000355904 | GTF2E2  | 6.91 | 0.43 | 0.68  | 0.02  |
| 55 | ENST00000360938 | ETS2    | 6.89 | 0.43 | 0.57  | 0.09  |
| 56 | ENST00000221930 | TGFB1   | 6.82 | 0.43 | 0.11  | -0.57 |
| 57 | ENST00000299564 | CDYL2   | 6.68 | 0.43 | 0.23  | -0.31 |
| 58 | ENST00000361354 | NCKAP1  | 6.60 | 0.42 | 0.15  | -0.51 |
| 59 | ENST00000379757 | TXNDC5  | 6.35 | 0.41 | 0.03  | -0.59 |
| 60 | ENST00000325421 | ZNF579  | 6.25 | 0.41 | 0.92  | 0.18  |
| 61 | ENST00000262238 | YY1     | 6.09 | 0.40 | 0.57  | 0.10  |
| 62 | ENST00000454402 | RFC5    | 6.05 | 0.40 | 0.58  | -0.09 |
| 63 | ENST00000366510 | SCCPDH  | 5.88 | 0.40 | 0.35  | -0.11 |
| 64 | ENST00000460006 | CDS2    | 5.88 | 0.40 | -0.37 | -1.11 |
| 65 | ENST00000379380 | LYRM7   | 5.87 | 0.39 | -0.08 | -0.81 |
| 66 | ENST00000506817 | RHOBTB3 | 5.82 | 0.39 | 0.77  | -0.48 |
| 67 | ENST00000553630 | CALM1   | 5.78 | 0.39 | 0.37  | -0.14 |
| 68 | ENST00000354359 | GNAS    | 5.75 | 0.39 | 0.61  | -0.14 |
| 69 | ENST00000276282 | MFHAS1  | 5.74 | 0.39 | 0.70  | 0.29  |
| 70 | ENST00000378103 | GBA2    | 5.74 | 0.39 | 0.43  | -0.09 |
| 71 | ENST00000233154 | NCK2    | 5.57 | 0.38 | 0.50  | -0.20 |
| 72 | ENST00000355415 | MFSD12  | 5.47 | 0.38 | 0.78  | -0.09 |
| 73 | ENST00000329286 | RAB12   | 5.32 | 0.37 | 0.61  | 0.06  |
| 74 | ENST00000376834 | C9orf41 | 5.31 | 0.37 | -0.15 | -0.85 |
| 75 | ENST00000352397 | CYB5R3  | 5.15 | 0.36 | 0.65  | -0.01 |

|     |                 |          |      |      |       |       |
|-----|-----------------|----------|------|------|-------|-------|
| 76  | ENST00000358173 | EPHB4    | 5.15 | 0.36 | 0.31  | -0.22 |
| 77  | ENST00000291900 | ZER1     | 5.14 | 0.36 | 0.61  | 0.13  |
| 78  | ENST00000222308 | FKBP8    | 5.08 | 0.36 | 0.64  | -0.09 |
| 79  | ENST00000298585 | ZMYND19  | 5.03 | 0.36 | 0.76  | 0.30  |
| 80  | ENST00000396684 | ATN1     | 4.94 | 0.35 | 0.87  | 0.09  |
| 81  | ENST00000361434 | LPHN1    | 4.70 | 0.34 | 0.48  | -0.15 |
| 82  | ENST00000373218 | EIF4EBP2 | 4.67 | 0.34 | -0.05 | -0.66 |
| 83  | ENST00000263025 | MAPK3    | 4.52 | 0.33 | 0.49  | -0.21 |
| 84  | ENST00000431526 | ZNF598   | 4.44 | 0.33 | 1.06  | 0.23  |
| 85  | ENST00000409140 | SPATS2L  | 4.43 | 0.33 | 0.79  | 0.04  |
| 86  | ENST00000234111 | ODC1     | 4.33 | 0.32 | 0.30  | -0.38 |
| 87  | ENST00000228495 | KCTD10   | 4.13 | 0.31 | -0.10 | -0.60 |
| 88  | ENST00000250916 | KLF16    | 4.05 | 0.31 | 0.85  | 0.28  |
| 89  | ENST00000078429 | GNA11    | 4.02 | 0.31 | 0.79  | 0.19  |
| 90  | ENST00000369109 | APH1A    | 4.00 | 0.31 | 0.16  | -0.22 |
| 91  | ENST00000513339 | REEP5    | 3.91 | 0.30 | 1.25  | -0.70 |
| 92  | ENST00000395423 | TCF3     | 3.86 | 0.30 | 0.81  | 0.05  |
| 93  | ENST00000275766 | ZC3HAV1L | 3.84 | 0.30 | 0.30  | -0.22 |
| 94  | ENST00000557441 | CCNK     | 3.79 | 0.30 | 0.81  | -0.34 |
| 95  | ENST00000433375 | GLIS2    | 3.76 | 0.29 | 0.61  | 0.08  |
| 96  | ENST00000341446 | BRI3BP   | 3.75 | 0.29 | 0.42  | -0.06 |
| 97  | ENST00000380243 | CCDC85C  | 3.68 | 0.29 | 0.88  | 0.13  |
| 98  | ENST00000289703 | ELK4     | 3.64 | 0.29 | 0.75  | -0.58 |
| 99  | ENST00000306666 | PTGER3   | 3.62 | 0.29 | -0.14 | -1.05 |
| 100 | ENST00000402868 | SETD8    | 3.60 | 0.29 | 0.39  | -0.18 |
| 101 | ENST00000406655 | PPP2CB   | 3.60 | 0.29 | 0.82  | 0.20  |
| 102 | ENST00000339438 | CSDE1    | 3.60 | 0.29 | 0.52  | -0.08 |
| 103 | ENST00000368954 | CERS2    | 3.56 | 0.28 | 0.44  | -0.11 |

|     |                 |           |      |      |      |       |
|-----|-----------------|-----------|------|------|------|-------|
| 104 | ENST00000368594 | INPP5A    | 3.52 | 0.28 | 0.21 | -0.20 |
| 105 | ENST00000525817 | NPEPL1    | 3.50 | 0.28 | 0.78 | -0.17 |
| 106 | ENST00000320619 | ZNRF1     | 3.47 | 0.28 | 0.29 | -0.39 |
| 107 | ENST00000219794 | BCKDK     | 3.46 | 0.28 | 0.35 | -0.41 |
| 108 | ENST00000431765 | DVL3      | 3.46 | 0.28 | 1.25 | -0.12 |
| 109 | ENST00000374270 | SUSD1     | 3.45 | 0.28 | 0.62 | -0.31 |
| 110 | ENST00000541272 | UBC       | 3.44 | 0.28 | 0.67 | -0.78 |
| 111 | ENST00000058691 | HEBP2     | 3.43 | 0.28 | 0.51 | 0.03  |
| 112 | ENST00000204566 | SPG21     | 3.43 | 0.28 | 0.49 | -0.13 |
| 113 | ENST00000301732 | ABCA3     | 3.43 | 0.28 | 0.61 | 0.18  |
| 114 | ENST00000359282 | PCBP2     | 3.41 | 0.28 | 0.34 | -0.42 |
| 115 | ENST00000326840 | DCBLD2    | 3.41 | 0.27 | 0.23 | -0.38 |
| 116 | ENST00000405675 | CSNK1E    | 3.41 | 0.27 | 0.52 | 0.01  |
| 117 | ENST00000468435 | UHRF2     | 3.40 | 0.27 | 1.08 | -0.67 |
| 118 | ENST00000275364 | GNA12     | 3.39 | 0.27 | 0.04 | -0.32 |
| 119 | ENST00000376372 | WDR45     | 3.37 | 0.27 | 0.00 | -0.58 |
| 120 | ENST00000250896 | MKNK2     | 3.33 | 0.27 | 0.36 | -0.28 |
| 121 | ENST00000375107 | AGPAT1    | 3.26 | 0.27 | 0.68 | 0.11  |
| 122 | ENST00000374557 | EPB41L4B  | 3.23 | 0.26 | 0.97 | 0.29  |
| 123 | ENST00000302277 | ZNF804A   | 3.22 | 0.26 | 0.55 | -0.56 |
| 124 | ENST00000357324 | ATP13A1   | 3.21 | 0.26 | 0.57 | -0.28 |
| 125 | ENST00000375793 | PLEKHM2   | 3.21 | 0.26 | 0.83 | 0.27  |
| 126 | ENST00000434316 | TMCO3     | 3.18 | 0.26 | 0.12 | -0.35 |
| 127 | ENST00000309909 | FBXW8     | 3.16 | 0.26 | 0.53 | -0.51 |
| 128 | ENST00000534699 | CSDE1     | 3.16 | 0.26 | 0.43 | -0.24 |
| 129 | ENST00000415050 | C14orf109 | 3.14 | 0.26 | 0.55 | -0.05 |
| 130 | ENST00000324093 | PLXND1    | 3.09 | 0.26 | 0.20 | -0.32 |
| 131 | ENST00000359280 | ADAM15    | 3.07 | 0.25 | 1.47 | -0.04 |

|     |                 |             |      |      |      |       |
|-----|-----------------|-------------|------|------|------|-------|
| 132 | ENST00000355849 | KHDRBS3     | 3.01 | 0.25 | 1.25 | 0.26  |
| 133 | ENST00000219548 | STUB1       | 3.00 | 0.25 | 0.48 | 0.02  |
| 134 | ENST00000366624 | RP5-862P8.2 | 2.99 | 0.25 | 0.44 | -0.22 |
| 135 | ENST00000525266 | ZNF7        | 2.98 | 0.25 | 0.87 | -0.18 |
| 136 | ENST00000409939 | TBC1D10B    | 2.95 | 0.25 | 0.77 | 0.18  |
| 137 | ENST00000367142 | NUCKS1      | 2.93 | 0.25 | 0.62 | -0.02 |
| 138 | ENST00000359246 | PHF2        | 2.89 | 0.24 | 0.50 | 0.12  |
| 139 | ENST00000373896 | PHF19       | 2.87 | 0.24 | 0.39 | 0.08  |
| 140 | ENST00000546652 | PCBP2       | 2.86 | 0.24 | 0.69 | -0.17 |
| 141 | ENST00000405333 | ODC1        | 2.84 | 0.24 | 0.45 | -0.17 |
| 142 | ENST00000281187 | VPS26B      | 2.82 | 0.24 | 0.60 | 0.21  |
| 143 | ENST00000377045 | ARAF        | 2.81 | 0.24 | 0.46 | -0.01 |
| 144 | ENST00000335255 | FOXK2       | 2.80 | 0.24 | 0.53 | 0.07  |
| 145 | ENST00000457361 | IKZF2       | 2.78 | 0.24 | 0.22 | -0.37 |
| 146 | ENST00000379016 | HIPK3       | 2.68 | 0.23 | 0.16 | -0.51 |
| 147 | ENST00000391831 | AKT1S1      | 2.67 | 0.23 | 0.27 | -1.27 |
| 148 | ENST00000355300 | LINGO1      | 2.66 | 0.23 | 0.63 | -0.17 |
| 149 | ENST00000541297 | CLPTM1      | 2.61 | 0.22 | 1.44 | -0.06 |
| 150 | ENST00000503731 | TUSC3       | 2.59 | 0.22 | 0.51 | -0.22 |
| 151 | ENST00000513317 | ACSL1       | 2.56 | 0.22 | 0.50 | -0.53 |
| 152 | ENST00000504639 | PAIP1       | 2.54 | 0.22 | 0.84 | -0.36 |
| 153 | ENST00000458427 | JRKL        | 2.50 | 0.22 | 0.37 | -0.63 |
| 154 | ENST00000228251 | CSDA        | 2.49 | 0.22 | 0.57 | 0.10  |
| 155 | ENST00000549863 | PCBP2       | 2.48 | 0.22 | 0.78 | -0.02 |
| 156 | ENST00000246163 | MAX         | 2.47 | 0.22 | 1.24 | 0.33  |
| 157 | ENST00000361246 | CDC42BPB    | 2.47 | 0.22 | 0.77 | 0.35  |
| 158 | ENST00000276033 | SLC16A2     | 2.45 | 0.21 | 0.67 | 0.14  |

|     |                 |          |      |      |       |       |
|-----|-----------------|----------|------|------|-------|-------|
| 159 | ENST00000547026 | ZNF641   | 2.44 | 0.21 | 0.55  | -0.55 |
| 160 | ENST00000328965 | OAF      | 2.44 | 0.21 | 0.53  | -0.03 |
| 161 | ENST00000263121 | SMARCB1  | 2.42 | 0.21 | 0.96  | 0.23  |
| 162 | ENST00000262325 | AP2B1    | 2.41 | 0.21 | 1.28  | 0.44  |
| 163 | ENST00000327490 | FAM100B  | 2.40 | 0.21 | 0.46  | -0.12 |
| 164 | ENST00000323267 | TMEM63B  | 2.38 | 0.21 | -0.05 | -0.43 |
| 165 | ENST00000547573 | C12orf76 | 2.38 | 0.21 | 0.47  | -0.68 |
| 166 | ENST00000396247 | RDH13    | 2.36 | 0.21 | 0.31  | -0.93 |
| 167 | ENST00000262160 | SMAD2    | 2.34 | 0.21 | 0.23  | -0.38 |
| 168 | ENST00000369446 | F8A1     | 2.32 | 0.20 | 0.80  | 0.33  |
| 169 | ENST00000535361 | STX3     | 2.32 | 0.20 | 0.64  | -0.32 |
| 170 | ENST00000513588 | CTNND2   | 2.31 | 0.20 | 1.12  | 0.34  |
| 171 | ENST00000007390 | TSR3     | 2.31 | 0.20 | 0.61  | 0.07  |
| 172 | ENST00000456764 | IGFBP2   | 2.30 | 0.20 | 0.36  | -0.42 |
| 173 | ENST00000339526 | GLUL     | 2.30 | 0.20 | 0.38  | -0.07 |
| 174 | ENST00000248996 | GNAZ     | 2.29 | 0.20 | 0.71  | 0.20  |
| 175 | ENST00000461735 | SLC4A2   | 2.26 | 0.20 | 0.83  | -0.63 |

**eIF4A1-independent transcripts**

| No | Transcript ID   | Gene name | Bayes factor | Posterior probability | eta1_1 | eta1_2 |
|----|-----------------|-----------|--------------|-----------------------|--------|--------|
| 1  | ENST00000263233 | SYP       | 26.40        | 0.75                  | 0.09   | 1.58   |
| 2  | ENST00000270066 | SMG9      | 17.84        | 0.66                  | -0.16  | 0.33   |
| 3  | ENST00000320270 | RRS1      | 12.31        | 0.58                  | -0.01  | 0.51   |
| 4  | ENST00000306014 | DDX54     | 7.65         | 0.46                  | -0.78  | 0.31   |
| 5  | ENST00000300540 | ZNF85     | 7.19         | 0.44                  | -0.48  | 0.65   |
| 6  | ENST00000474861 | HBXIP     | 6.64         | 0.42                  | -0.96  | 0.88   |

|    |                 |               |      |      |       |       |
|----|-----------------|---------------|------|------|-------|-------|
| 7  | ENST00000311922 | TRIB1         | 6.53 | 0.42 | -0.15 | 0.35  |
| 8  | ENST00000246229 | PLAGL2        | 6.51 | 0.42 | -0.11 | 0.27  |
| 9  | ENST00000336139 | ZNF202        | 5.56 | 0.38 | -0.98 | 0.52  |
| 10 | ENST00000456458 | NT5C3         | 5.46 | 0.38 | -0.24 | 0.59  |
| 11 | ENST00000351986 | NPM1          | 5.33 | 0.37 | -0.48 | 0.08  |
| 12 | ENST00000354241 | TRIM4         | 5.09 | 0.36 | -0.46 | 0.09  |
| 13 | ENST00000253024 | TRIM28        | 4.98 | 0.36 | -0.33 | 0.27  |
| 14 | ENST00000340913 | HNRNPA1       | 4.76 | 0.35 | -0.68 | -0.06 |
| 15 | ENST00000546591 | RPL41         | 4.51 | 0.33 | -0.17 | 0.41  |
| 16 | ENST00000373078 | NAIF1         | 4.29 | 0.32 | -0.57 | 0.03  |
| 17 | ENST00000378643 | FANCG         | 4.17 | 0.32 | -0.47 | 0.11  |
| 18 | ENST00000526453 | RP11-11011.12 | 4.02 | 0.31 | -0.79 | 0.21  |
| 19 | ENST00000216714 | APEX1         | 3.94 | 0.30 | -0.54 | 0.00  |
| 20 | ENST00000527791 | RPS25         | 3.85 | 0.30 | -0.09 | 0.68  |
| 21 | ENST00000394287 | MED1          | 3.80 | 0.30 | -0.37 | 0.27  |
| 22 | ENST00000524496 | RPL27A        | 3.55 | 0.28 | -0.15 | 0.38  |
| 23 | ENST00000506763 | HAUS3         | 3.47 | 0.28 | -0.29 | 0.68  |
| 24 | ENST00000396113 | NDUFAF6       | 3.45 | 0.28 | -0.77 | 0.50  |
| 25 | ENST00000369722 | ATP5F1        | 3.44 | 0.28 | -0.61 | 0.32  |
| 26 | ENST00000431643 | EIF3B         | 3.26 | 0.27 | -0.69 | 1.65  |
| 27 | ENST00000462426 | DYNC2LI1      | 3.23 | 0.26 | -0.94 | 0.66  |
| 28 | ENST00000239165 | HOXB7         | 3.11 | 0.26 | -0.16 | 0.44  |
| 29 | ENST00000309668 | INHBC         | 3.07 | 0.25 | -1.38 | 0.59  |
| 30 | ENST00000355057 | HIST1H4J      | 3.04 | 0.25 | -0.34 | 0.45  |
| 31 | ENST00000344683 | MCPH1         | 2.97 | 0.25 | -0.88 | 0.09  |
| 32 | ENST00000335987 | OVOL1         | 2.88 | 0.24 | -0.37 | 0.02  |
| 33 | ENST00000367166 | TFB1M         | 2.82 | 0.24 | -0.34 | 0.29  |

|    |                 |          |      |      |       |       |
|----|-----------------|----------|------|------|-------|-------|
| 34 | ENST00000238667 | FLVCR2   | 2.79 | 0.24 | -0.67 | -0.29 |
| 35 | ENST00000394800 | MATR3    | 2.71 | 0.23 | -0.62 | 1.11  |
| 36 | ENST00000328550 | ZNF571   | 2.69 | 0.23 | -1.05 | 0.80  |
| 37 | ENST00000409468 | HSPE1    | 2.66 | 0.23 | 0.04  | 0.79  |
| 38 | ENST00000551132 | CNOT2    | 2.64 | 0.23 | -0.65 | 0.50  |
| 39 | ENST00000330368 | ACTRT3   | 2.62 | 0.23 | -0.41 | 0.28  |
| 40 | ENST00000335117 | ZNF486   | 2.57 | 0.22 | -0.42 | 0.33  |
| 41 | ENST00000380290 | FAM96A   | 2.54 | 0.22 | -0.15 | 0.49  |
| 42 | ENST00000534176 | UBXN1    | 2.43 | 0.21 | -0.31 | 0.26  |
| 43 | ENST00000318317 | LRR1     | 2.41 | 0.21 | -0.29 | 0.55  |
| 44 | ENST00000373727 | MRRF     | 2.38 | 0.21 | -0.65 | 0.64  |
| 45 | ENST00000254166 | ZNF132   | 2.35 | 0.21 | -0.78 | 0.22  |
| 46 | ENST00000221431 | FBXO17   | 2.34 | 0.21 | -0.35 | 0.15  |
| 47 | ENST00000257979 | MIP      | 2.31 | 0.20 | -0.39 | 0.71  |
| 48 | ENST00000261070 | COX17    | 2.31 | 0.20 | -0.04 | 0.35  |
| 49 | ENST00000360441 | HIST1H4E | 2.27 | 0.20 | -0.65 | 0.27  |



**Supplementary Table 6.** Analysis of 5' UTR characteristics of translationally eIF4A1-dependent and independent mRNAs. The Kolmogorov-Smirnov test was performed for the parameters listed for eIF4A1-dependent and eIF4A1-independent transcript. D= Kolmogorov–Smirnov statistic.

| <b>5'UTR characteristics</b> | <b>D</b> | <b>p-value</b> |
|------------------------------|----------|----------------|
| GC content                   | 0.59     | 6.20E-12       |
| C content                    | 0.45     | 4.30E-07       |
| G content                    | 0.44     | 1.20E-06       |
| $\Delta$ G last 50nt         | 0.40     | 1.20E-05       |
| $\Delta$ G full length       | 0.29     | 3.60E-03       |
| $\Delta$ G first 50nt        | 0.28     | 4.90E-03       |
| $\Delta$ G first 1000nt      | 0.24     | 2.90E-02       |
| length                       | 0.22     | 5.10E-02       |
| AUG count                    | 0.16     | 2.90E-01       |

**Supplementary Table 8.** Details of immunohistochemical assays.

| Antigen | Antibody              | Supplier   | Antigen retrieval method | Antibody concentration | Incubation conditions | Notes                                                                |
|---------|-----------------------|------------|--------------------------|------------------------|-----------------------|----------------------------------------------------------------------|
| eIF4E   | sc-9976 (mouse mono)  | Santa Cruz | Citrate 20' at 100C      | 1:100                  | 15' at room temp      | antibody diluted in 300mM TBS with serum block to reduce background. |
| eIF4A1  | ab31217 (rabbit poly) | Abcam      | edta 20' at 100C         | 1:50                   | 60' at room temp      |                                                                      |
| eIF4B   | 2232-1 (rabbit mono)  | Epitomics  | edta 20' at 100C         | 1:100                  | 15' at room temp      |                                                                      |
| PDCD4   | ab80590 (rabbit mono) | Abcam      | edta 20' at 100C         | 1:1500                 | 15' at room temp      |                                                                      |

**Supplementary Table 9.** Numbers at risk in Kaplan-Meier analyses.

| Time (Years) |   | Number at risk |     |     |     |     |    |
|--------------|---|----------------|-----|-----|-----|-----|----|
|              |   | 0              | 2   | 4   | 6   | 8   | 10 |
| eIF4E        | 0 | 0              | 42  | 52  | 49  | 45  | 35 |
|              | 1 | 0              | 104 | 119 | 118 | 103 | 86 |
|              | 2 | 0              | 110 | 113 | 103 | 86  | 69 |
|              | 3 | 0              | 57  | 51  | 53  | 48  | 39 |

| Time (Years) |   | Number at risk |     |     |     |     |     |
|--------------|---|----------------|-----|-----|-----|-----|-----|
|              |   | 0              | 2   | 4   | 6   | 8   | 10  |
| eIF4A1       | 0 | 0              | 29  | 38  | 37  | 35  | 28  |
|              | 1 | 0              | 128 | 136 | 124 | 124 | 106 |
|              | 2 | 0              | 154 | 157 | 128 | 128 | 98  |
|              | 3 | 0              | 68  | 75  | 54  | 54  | 36  |

| Time (Years) |   | Number at risk |     |     |     |     |    |
|--------------|---|----------------|-----|-----|-----|-----|----|
|              |   | 0              | 2   | 4   | 6   | 8   | 10 |
| eIF4B        | 0 | 0              | 56  | 59  | 60  | 58  | 50 |
|              | 1 | 0              | 109 | 118 | 114 | 109 | 93 |
|              | 2 | 0              | 100 | 111 | 99  | 85  | 65 |

| Time (Years) |   | Number at risk |     |     |     |     |     |
|--------------|---|----------------|-----|-----|-----|-----|-----|
|              |   | 0              | 2   | 4   | 6   | 8   | 10  |
| PDCD4 (nuc)  | 0 | 0              | 221 | 269 | 268 | 230 | 159 |
|              | 1 | 0              | 317 | 389 | 380 | 312 | 217 |
|              | 2 | 1              | 354 | 421 | 413 | 358 | 269 |
|              | 3 | 0              | 211 | 250 | 232 | 194 | 146 |
