# Supplementary material for: The malignant phenotype in breast cancer is driven by eIF4A1-mediated changes in the translational landscape
Source: PubMed Central journal article supplement (PMC4669741; doi:10.1038/cddis.2014.542), 2015-01-22
Supplement: cddis2014542x3.pdf [file cddis2014542x3.pdf]

**Supplementary Table 7. Over-representation and Gene Set Enrichment analyses of eIF4A1-dependence at the level of translation (polysome/subpolysome redistribution) and total mRNA abundance.**

**Over-representation analysis (protein families)**  
All non-redundant categories with >2 genes shown

| eIF4A1-dependent mRNAs    | P (FDR)    | Expected no | Observed no | Genes                                                                     |
|---------------------------|------------|-------------|-------------|---------------------------------------------------------------------------|
| G-protein alpha subunit   | 3.93E-06   | 0.130685    | 5           | GNAZ GNAI2 GNA11 GNAS GNA12                                               |
| Cyclin, N-terminal domain | 0.00313468 | 0.296218    | 4           | CCNI CCND3 CCNK CABLES2                                                   |
| Protein kinase domain     | 0.00316199 | 3.13643     | 11          | ADRBK1 MARK4 TESK1 CDC42BPB CSNK1E PRKACA PKN1 HIPK3 MKNK2 MAPKAPK2 MAPK3 |
| eIF4A1-independent mRNAs  |            |             |             |                                                                           |
| Zinc finger, C2H2 type    | 0.0102672  | 1.40973     | 6           | ZNF571 ZNF132 OVOL1 PLAGL2 ZNF85 ZNF202                                   |

**GSEA Analysis (eIF4A1-dependence)**

Top 20 categories with FDR<0.25 shown

| eIF4A1-dependent gene sets                                                 | SIZE | ES          | NES        | NOM p-val   | FDR q-val   | FWER p-val | RANK AT MAX | EADING EDGE                     |
|----------------------------------------------------------------------------|------|-------------|------------|-------------|-------------|------------|-------------|---------------------------------|
| <b>Biocarta categories</b>                                                 |      |             |            |             |             |            |             |                                 |
| BIOCARTA_CREB_PATHWAY                                                      | 27   | -0.54233336 | -2.5955534 | 0           | 0.002617879 | 0.002      | 3050        | tags=52%, list=16%, signal=61%  |
| BIOCARTA_ERK_PATHWAY                                                       | 28   | -0.5300096  | -2.4911392 | 0           | 0.004615376 | 0.007      | 955         | tags=25%, list=5%, signal=26%   |
| BIOCARTA_GPCR_PATHWAY                                                      | 84   | -0.4527145  | -2.3306682 | 0           | 0.012513909 | 0.027      | 854         | tags=24%, list=4%, signal=25%   |
| BIOCARTA_MAPK_PATHWAY                                                      | 35   | -0.52819548 | -2.2327616 | 0           | 0.021895325 | 0.064      | 1933        | tags=25%, list=10%, signal=27%  |
| BIOCARTA_BARSTIN_SRC_PATHWAY                                               | 34   | -0.56624985 | -2.1756601 | 0           | 0.022959514 | 0.105      | 225         | tags=20%, list=1%, signal=20%   |
| BIOCARTA_IGF1R_PATHWAY                                                     | 23   | -0.46398823 | -2.1142561 | 0.003738318 | 0.040106993 | 0.163      | 3050        | tags=48%, list=16%, signal=57%  |
| BIOCARTA_BAD_PATHWAY                                                       | 26   | -0.45122012 | -2.0612748 | 0.005825243 | 0.04141674  | 0.239      | 3264        | tags=50%, list=17%, signal=60%  |
| BIOCARTA_CHREBP2_PATHWAY                                                   | 42   | -0.37067717 | -2.0760975 | 0.005671077 | 0.042666525 | 0.223      | 3493        | tags=40%, list=18%, signal=49%  |
| BIOCARTA_GCR_PATHWAY                                                       | 19   | -0.48994818 | -2.0832496 | 0.001996008 | 0.04606622  | 0.213      | 1993        | tags=37%, list=10%, signal=41%  |
| BIOCARTA_TGFB_PATHWAY                                                      | 19   | -0.458955   | -1.9603087 | 0.003992016 | 0.07135666  | 0.411      | 2012        | tags=32%, list=10%, signal=35%  |
| BIOCARTA_AKAPENRISOME_PATHWAY                                              | 15   | -0.51586366 | -1.9439404 | 0.007797271 | 0.07307961  | 0.444      | 3050        | tags=47%, list=16%, signal=55%  |
| BIOCARTA_TEL_PATHWAY                                                       | 18   | -0.45313245 | -1.8903471 | 0.009881423 | 0.0938439   | 0.565      | 2866        | tags=50%, list=15%, signal=59%  |
| BIOCARTA_FMLP_PATHWAY                                                      | 34   | -0.34672955 | -1.7761961 | 0.019120459 | 0.13744554  | 0.804      | 3536        | tags=38%, list=18%, signal=47%  |
| BIOCARTA_MPR_PATHWAY                                                       | 34   | -0.35053113 | -1.7980186 | 0.021526419 | 0.13755181  | 0.768      | 886         | tags=18%, list=5%, signal=18%   |
| BIOCARTA_PYK2_PATHWAY                                                      | 27   | -0.3700757  | -1.7818187 | 0.015209125 | 0.1412102   | 0.797      | 3094        | tags=37%, list=16%, signal=44%  |
| BIOCARTA_GSK3_PATHWAY                                                      | 27   | -0.37915888 | -1.8046193 | 0.018621974 | 0.14248395  | 0.751      | 5497        | tags=59%, list=28%, signal=83%  |
| BIOCARTA_CCR3_PATHWAY                                                      | 23   | -0.40172747 | -1.756542  | 0.017142856 | 0.14360377  | 0.835      | 235         | tags=13%, list=1%, signal=13%   |
| BIOCARTA_IL2RB_PATHWAY                                                     | 38   | -0.33062506 | -1.7341974 | 0.021400778 | 0.14572135  | 0.866      | 2933        | tags=37%, list=15%, signal=43%  |
| BIOCARTA_CSK_PATHWAY                                                       | 22   | -0.38944936 | -1.7404138 | 0.025145067 | 0.14850758  | 0.856      | 424         | tags=14%, list=2%, signal=14%   |
| BIOCARTA_VIP_PATHWAY                                                       | 25   | -0.37137872 | -1.6913317 | 0.029940119 | 0.1705908   | 0.912      | 1263        | tags=38%, list=17%, signal=34%  |
| <b>Reactome categories</b>                                                 |      |             |            |             |             |            |             |                                 |
| REACTOME_DAG_AND_IP3_SIGNALING                                             | 31   | -0.62402305 | -3.1233697 | 0           | 0           | 0          | 1377        | tags=39%, list=7%, signal=42%   |
| REACTOME_PLCC_BETA_MEDIATED_EVENTS                                         | 42   | -0.56943005 | -3.170228  | 0           | 0           | 0          | 790         | tags=33%, list=7%, signal=36%   |
| REACTOME_CA_DEPENDENT_EVENTS                                               | 29   | -0.63909204 | -3.1079552 | 0           | 0           | 0          | 1377        | tags=41%, list=7%, signal=44%   |
| REACTOME_DOWNSTREAM_SIGNAL_TRANSDUCTION                                    | 91   | -0.4261822  | -2.9814339 | 0           | 0           | 0          | 3050        | tags=36%, list=16%, signal=43%  |
| REACTOME_OPIOID_SIGNALING                                                  | 76   | -0.44493353 | -2.9120543 | 0           | 0           | 0          | 1377        | tags=26%, list=7%, signal=28%   |
| REACTOME_SIGNALING_BY_FGFR                                                 | 107  | -0.39662504 | -2.8903675 | 0           | 0           | 0          | 2092        | tags=29%, list=11%, signal=32%  |
| REACTOME_NGF_SIGNALING_VIA_TRKA_FROM_THE_PLASMA_MEMBRANE                   | 133  | -0.37264517 | -2.884793  | 0           | 0           | 0          | 2112        | tags=29%, list=11%, signal=32%  |
| REACTOME_GLUCAGON_SIGNALING_IN_METABOLIC_REGULATION                        | 42   | -0.56314605 | -2.8174683 | 0           | 0           | 0          | 790         | tags=25%, list=4%, signal=26%   |
| REACTOME_SIGNALING_BY_NG2                                                  | 211  | -0.32020423 | -2.7881968 | 0           | 0           | 0          | 2112        | tags=27%, list=11%, signal=30%  |
| REACTOME_SIGNALING_BY_ERBB2                                                | 97   | -0.39203283 | -2.7732958 | 0           | 0           | 0          | 2092        | tags=28%, list=11%, signal=31%  |
| REACTOME_SIGNALING_BY_FGFR_IN_DISEASE                                      | 121  | -0.36532968 | -2.7553017 | 0           | 0           | 0          | 2092        | tags=27%, list=11%, signal=30%  |
| REACTOME_DOWNSTREAM_SIGNALING_OF_ACTIVATED_FGFR                            | 96   | -0.3818161  | -2.737539  | 0           | 0           | 0          | 2092        | tags=27%, list=11%, signal=30%  |
| REACTOME_SIGNALING_BY_EGFR_IN_CANCER                                       | 105  | -0.37714633 | -2.730975  | 0           | 0           | 0          | 2112        | tags=27%, list=11%, signal=30%  |
| REACTOME_PHOSPHOLIPASE_C_MEDIATED_CASCADE                                  | 52   | -0.46923918 | -2.684026  | 0           | 6.96E-05    | 0.001      | 1377        | tags=27%, list=7%, signal=29%   |
| REACTOME_REGULATION_OF_WATER_BALANCE_BY_RENAL_AQUAPORINS                   | 42   | -0.48701996 | -2.702312  | 0           | 7.43E-05    | 0.001      | 1377        | tags=24%, list=7%, signal=26%   |
| REACTOME_SIGNALING_BY_PDGFR                                                | 118  | -0.36439795 | -2.7103796 | 0           | 7.96E-05    | 0.001      | 3050        | tags=32%, list=16%, signal=38%  |
| REACTOME_AQUAPORIN_MEDIATED_TRANSPORT                                      | 49   | -0.4354774  | -2.4930024 | 0           | 4.54E-04    | 0.007      | 1377        | tags=22%, list=7%, signal=24%   |
| REACTOME_DARRP_32_EVENTS                                                   | 24   | -0.55811363 | -2.505304  | 0           | 4.81E-04    | 0.007      | 957         | tags=38%, list=5%, signal=39%   |
| REACTOME_PKA_MEDIATED_PHOSPHORYLATION_OF_CREB                              | 17   | -0.6006834  | -2.3846416 | 0.001926782 | 0.001540262 | 0.024      | 1377        | tags=35%, list=7%, signal=38%   |
| REACTOME_INTEGRATION_OF_ENERGY_METABOLISM                                  | 115  | -0.32096735 | -2.3771482 | 0           | 0.001578756 | 0.026      | 1410        | tags=17%, list=7%, signal=19%   |
| <b>GO categories</b>                                                       |      |             |            |             |             |            |             |                                 |
| REGULATION_OF_PROTEIN_MODIFICATION_PROCESS                                 | 44   | -0.3937945  | -2.2585683 | 0           | 0.048124332 | 0.202      | 2750        | tags=32%, list=14%, signal=37%  |
| PROTEIN_AMINO_ACID_PHOSPHORYLATION                                         | 271  | -0.24912406 | -2.2691388 | 0           | 0.054979853 | 0.187      | 2750        | tags=25%, list=14%, signal=29%  |
| IMMUNE_EFFECTOR_PROCESS                                                    | 39   | -0.42147832 | -2.183442  | 0.003584229 | 0.05769448  | 0.283      | 5293        | tags=33%, list=27%, signal=37%  |
| POST_TRANSLATIONAL_PROTEIN_MODIFICATION                                    | 268  | -0.2272983  | -2.3314106 | 0           | 0.06028459  | 0.11       | 3282        | tags=25%, list=17%, signal=30%  |
| OXIDOREDUCTASE_ACTIVITY_ACTING_ON_NADH_OR_NADPH                            | 45   | -0.48549327 | -2.27604   | 0           | 0.068132125 | 0.176      | 2890        | tags=52%, list=15%, signal=61%  |
| PHOSPHORYLATION                                                            | 304  | -0.22965401 | -2.1268992 | 0           | 0.083290465 | 0.522      | 2553        | tags=22%, list=13%, signal=25%  |
| PROTEIN_UBIQUITINATION                                                     | 40   | -0.3902988  | -2.137502  | 0           | 0.08749176  | 0.499      | 509         | tags=15%, list=3%, signal=15%   |
| TUBULIN_BINDING                                                            | 47   | -0.35568342 | -2.0217686 | 0.005617978 | 0.088345    | 0.792      | 2918        | tags=34%, list=15%, signal=40%  |
| PROTEIN_KINASE_ACTIVITY                                                    | 279  | -0.22321065 | -2.0458796 | 0           | 0.091209635 | 0.737      | 3327        | tags=27%, list=17%, signal=32%  |
| UBIQUITIN_CYCLE                                                            | 48   | -0.3441603  | -2.024517  | 0.001855288 | 0.09154453  | 0.784      | 509         | tags=13%, list=3%, signal=13%   |
| COVALENT_CHROMATIN_MODIFICATION                                            | 25   | -0.45949483 | -2.0974743 | 0           | 0.09185648  | 0.594      | 1133        | tags=36%, list=8%, signal=38%   |
| PROTEIN_MODIFICATION_PROCESS                                               | 623  | -0.19204713 | -2.031397  | 0           | 0.0937083   | 0.772      | 2226        | tags=18%, list=11%, signal=19%  |
| PROTEIN_MODIFICATION_BY_SMALL_PROTEIN_CONJUGATION                          | 43   | -0.3799313  | -2.0276411 | 0           | 0.09429154  | 0.669      | 694         | tags=16%, list=4%, signal=17%   |
| HISTONE_MODIFICATION                                                       | 24   | -0.4388304  | -2.0680406 | 0.003824092 | 0.09498083  | 0.701      | 1133        | tags=33%, list=6%, signal=35%   |
| PHOSPHOTRANSFERASE_ACTIVITY_ALCOHOL_GROUP_AS_ACCEPTOR                      | 326  | -0.22289748 | -2.1446899 | 0           | 0.0951585   | 0.479      | 3927        | tags=31%, list=20%, signal=38%  |
| PROTEIN_KINASE_CASCADE                                                     | 289  | -0.21705455 | -2.0026777 | 0           | 0.09567664  | 0.834      | 2570        | tags=23%, list=13%, signal=26%  |
| BIOPOLYMER_MODIFICATION                                                    | 642  | -0.19192052 | -2.0470195 | 0           | 0.09699101  | 0.735      | 2226        | tags=18%, list=11%, signal=20%  |
| POSITIVE_REGULATION_OF_PROTEIN_MODIFICATION_PROCESS                        | 29   | -0.4252713  | -2.0740428 | 0.001976285 | 0.10136102  | 0.664      | 589         | tags=17%, list=3%, signal=18%   |
| <b>KEGG categories</b>                                                     |      |             |            |             |             |            |             |                                 |
| KEGG_COLORECTAL_CANCER                                                     | 62   | -0.4091385  | -2.5179148 | 0           | 0.001192593 | 0.003      | 4174        | tags=60%, list=22%, signal=64%  |
| KEGG_LONG_TERM_DEPRESSION                                                  | 70   | -0.3834733  | -2.4866211 | 0           | 0.001500783 | 0.005      | 1509        | tags=24%, list=8%, signal=26%   |
| KEGG_MELANOCYTES                                                           | 101  | -0.3432427  | -2.5228663 | 0           | 0.001788889 | 0.003      | 854         | tags=13%, list=4%, signal=13%   |
| KEGG_ENDOMETRIAL_CANCER                                                    | 52   | -0.41995326 | -2.4494536 | 0           | 0.002110235 | 0.009      | 4174        | tags=64%, list=22%, signal=68%  |
| KEGG_PROGESTERONE_MEDIATED_OOCYTE_MATURATION                               | 84   | -0.37418714 | -2.5450108 | 0           | 0.003577778 | 0.003      | 1657        | tags=24%, list=9%, signal=26%   |
| KEGG_GNHR_SIGNALING_PATHWAY                                                | 100  | -0.3230261  | -2.3402925 | 0           | 0.003841127 | 0.02       | 3501        | tags=30%, list=18%, signal=36%  |
| KEGG_PHOSPHATIDYLINOSITOL_SIGNALING_SYSTEM                                 | 67   | -0.34461805 | -2.2826203 | 0           | 0.004468318 | 0.027      | 2917        | tags=38%, list=15%, signal=45%  |
| KEGG_OOCYTE_MEIOSIS                                                        | 109  | -0.31234506 | -2.2765895 | 0           | 0.004814209 | 0.032      | 3119        | tags=30%, list=16%, signal=36%  |
| KEGG_GAP_JUNCTION                                                          | 88   | -0.32101044 | -2.213696  | 0           | 0.005896504 | 0.055      | 830         | tags=13%, list=4%, signal=13%   |
| KEGG_INSULIN_SIGNALING_PATHWAY                                             | 136  | -0.2824003  | -2.206712  | 0           | 0.006116179 | 0.051      | 3130        | tags=27%, list=16%, signal=32%  |
| KEGG_VASOPRESSIN_REGULATED_WATER_REABSORPTION                              | 44   | -0.38561144 | -2.2167768 | 0           | 0.006486594 | 0.065      | 185         | tags=9%, list=1%, signal=9%     |
| KEGG_DILATED_CARDIOMYOPATHY                                                | 89   | -0.32169828 | -2.226943  | 0           | 0.00693689  | 0.053      | 4308        | tags=37%, list=22%, signal=47%  |
| KEGG_VIBRIO_CHOLERAE_INFECTION                                             | 54   | -0.36529863 | -2.147904  | 0.001897533 | 0.008627246 | 0.089      | 536         | tags=11%, list=3%, signal=11%   |
| KEGG_LONG_TERM_POTENTIATION                                                | 69   | -0.32365182 | -2.0991592 | 0.001766785 | 0.010486206 | 0.119      | 3291        | tags=32%, list=17%, signal=38%  |
| KEGG_VASCULAR_SMOOTH_MUSCLE_CONTRACTION                                    | 115  | -0.28012586 | -2.0744958 | 0.001730104 | 0.011968696 | 0.144      | 287         | tags=9%, list=1%, signal=9%     |
| KEGG_WNT_SIGNALING_PATHWAY                                                 | 49   | -0.2154519  | -2.0207522 | 0           | 0.017261395 | 0.21       | 3379        | tags=29%, list=17%, signal=35%  |
| KEGG_MAPK_SIGNALING_PATHWAY                                                | 260  | -0.21783839 | -1.9876659 | 0           | 0.021213107 | 0.27       | 2126        | tags=19%, list=11%, signal=21%  |
| KEGG_NEUROTROPIN_SIGNALING_PATHWAY                                         | 123  | -0.25646883 | -1.9216383 | 0           | 0.03143508  | 0.384      | 2933        | tags=30%, list=15%, signal=35%  |
| KEGG_RENAL_CELL_CARCINOMA                                                  | 70   | -0.29776672 | -1.9130478 | 0.001754386 | 0.031674974 | 0.405      | 3940        | tags=34%, list=20%, signal=43%  |
| KEGG_GLIOMA                                                                | 64   | -0.30039573 | -1.8961023 | 0.005309735 | 0.0330815   | 0.435      | 2933        | tags=31%, list=15%, signal=37%  |
| <b>eIF4A1-independent gene sets</b>                                        |      |             |            |             |             |            |             |                                 |
| <b>Biocarta pathways</b>                                                   |      |             |            |             |             |            |             |                                 |
| BIOCARTA_ATM_PATHWAY                                                       | 20   | 0.5128766   | 2.3067076  | 0           | 0.014876452 | 0.025      | 3765        | tags=65%, list=19%, signal=81%  |
| <b>Reactome categories</b>                                                 |      |             |            |             |             |            |             |                                 |
| REACTOME_PEPTIDE_CHAIN_ELONGATION                                          | 84   | 0.30287075  | 2.2139184  | 0           | 0.09512686  | 0.112      | 9587        | tags=80%, list=49%, signal=157% |
| REACTOME_INFLUENZA_VIRAL_RNA_TRANSCRIPTION_AND_REPLICATION                 | 100  | 0.268495    | 2.0212114  | 0           | 0.10381648  | 0.404      | 9587        | tags=75%, list=49%, signal=148% |
| REACTOME_SRP_DEPENDENT_COTRANSLATIONAL_PROTEIN_TARGETING_TO_MEMBRANE       | 107  | 0.26355752  | 2.04156    | 0.002277904 | 0.11838357  | 0.361      | 9587        | tags=76%, list=49%, signal=149% |
| REACTOME_TRANSLATION_3_UTR_MEDIATED_TRANSLATIONAL_REGULATION               | 104  | 0.27068022  | 2.0455742  | 0           | 0.17161362  | 0.351      | 9587        | tags=77%, list=49%, signal=151% |
| REACTOME_TRANSLATION                                                       | 144  | 0.22564332  | 2.032145   | 0           | 0.19543718  | 0.707      | 9587        | tags=69%, list=48%, signal=132% |
| <b>GO categories</b>                                                       |      |             |            |             |             |            |             |                                 |
| DNA_DAMAGE_RESPONSESIGNAL_TRANSDUCTION_RESULTING_IN_INDUCTION_OF_APOPTOSIS | 15   | 0.59700537  | 2.294397   | 0           | 0.10954069  | 0.108      | 3765        | tags=73%, list=19%, signal=91%  |
| REGULATION_OF_MITOSIS                                                      | 41   | 0.3607356   | 2.1248572  | 0           | 0.14263822  | 0.363      | 3666        | tags=51%, list=19%, signal=63%  |
| DNA_DAMAGE_RESPONSESIGNAL_TRANSDUCTION                                     | 34   | 0.38482407  | 2.0864527  | 0.002155172 | 0.14303811  | 0.448      | 5121        | tags=59%, list=26%, signal=80%  |
| STERIOD_BINDING                                                            | 18   | 0.5183955   |            |             |             |            |             |                                 |

|                                           |    |            |           |             |             |       |                                      |
|-------------------------------------------|----|------------|-----------|-------------|-------------|-------|--------------------------------------|
| SPHINGOLIPID_METABOLIC_PROCESS            | 28 | 0.3652482  | 1.8422383 | 0.006048387 | 0.23489282  | 0.968 | 4796 tags=50%, list=25%, signal=66%  |
| GLYCOLIPID_METABOLIC_PROCESS              | 16 | 0.45011404 | 1.8054838 | 0.00814664  | 0.24744135  | 0.983 | 4486 tags=63%, list=25%, signal=81%  |
| <b>KEGG categories</b>                    |    |            |           |             |             |       |                                      |
| KEGG_PRIMARY_IMMUNODEFICIENCY             | 35 | 0.37557444 | 2.079092  | 0.00443459  | 0.067387976 | 0.081 | 5454 tags=63%, list=28%, signal=87%  |
| KEGG_RIBOSOME                             | 86 | 0.27904585 | 1.9882319 | 0.00100000  | 0.078129046 | 0.181 | 9587 tags=78%, list=49%, signal=153% |
| KEGG_DRUG_METABOLISM_CYTOCHROME_P450      | 69 | 0.27593297 | 1.904524  | 0.006976744 | 0.08724161  | 0.29  | 7951 tags=67%, list=41%, signal=113% |
| KEGG_PROANOATE_METABOLISM                 | 32 | 0.3215298  | 1.7396039 | 0.0125      | 0.13028204  | 0.636 | 4221 tags=44%, list=21%, signal=63%  |
| KEGG_ASCORBATE_AND_ALDARATE_METABOLISM    | 23 | 0.38493398 | 1.7652289 | 0.026431719 | 0.1329639   | 0.572 | 6662 tags=61%, list=29%, signal=86%  |
| KEGG_RETINOL_METABOLISM                   | 61 | 0.27068487 | 1.7745104 | 0.008639309 | 0.15773137  | 0.552 | 6259 tags=56%, list=32%, signal=82%  |
| KEGG_PORPHYRIN_AND_CHLOROPHYLL_METABOLISM | 39 | 0.2943337  | 1.6745461 | 0.018907564 | 0.16795994  | 0.772 | 6104 tags=54%, list=31%, signal=78%  |

**GSEA Analysis (Total mRNA)**

Top 20 categories with FDR<0.25 shown

Sets downregulated following eIF4A1 knockdown

|                                                                              | SIZE  | ES          | NES        | NOM p-val   | FDR q-val   | FWER p-val | RANK AT MAX EADING EDGE              |
|------------------------------------------------------------------------------|-------|-------------|------------|-------------|-------------|------------|--------------------------------------|
| <b>Biocarta Categories</b>                                                   |       |             |            |             |             |            |                                      |
| BIOCARTA_P53HYPOXIA_PATHWAY                                                  | 22    | -0.5545046  | -2.2824137 | 0           | 0.05229664  | 0.042      | 635 tags=27%, list=3%, signal=28%    |
| BIOCARTA_ATM_PATHWAY                                                         | 20    | -0.53155386 | -2.1413314 | 0.001996008 | 0.08515919  | 0.137      | 2903 tags=55%, list=15%, signal=65%  |
| BIOCARTA_TGFB_PATHWAY                                                        | 19    | -0.5239376  | -2.0634    | 0.004255319 | 0.106633346 | 0.225      | 1335 tags=37%, list=7%, signal=40%   |
| BIOCARTA_MTA3_PATHWAY                                                        | 18    | -0.5168277  | -2.0150928 | 0.010351967 | 0.11334843  | 0.313      | 2219 tags=30%, list=11%, signal=38%  |
| <b>Reactome categories</b>                                                   |       |             |            |             |             |            |                                      |
| REACTOME_CHOLESTEROL_BIOSYNTHESIS                                            | 22    | -0.5813942  | -2.43895   | 0           | 0.012873751 | 0.026      | 2075 tags=41%, list=11%, signal=46%  |
| REACTOME_TRANSPORT_OF_INORGANIC_CATIONS_ANIONS_AND_AMINO_ACIDS_OLIGOPEPTIDES | 92    | -0.37938014 | -2.4614101 | 0           | 0.017679015 | 0.018      | 5072 tags=49%, list=26%, signal=66%  |
| REACTOME_SPHINGOLIPID_DE_NOVO_BIOSYNTHESIS                                   | 30    | -0.5027991  | -2.3006655 | 0           | 0.032122694 | 0.09       | 368 tags=13%, list=2%, signal=14%    |
| REACTOME_ENOS_ACTIVATION_AND_REGULATION                                      | 19    | -0.5472194  | -2.1584637 | 0.003929273 | 0.050877597 | 0.266      | 6540 tags=74%, list=34%, signal=111% |
| REACTOME_SIGNALING_BY_NOTCH                                                  | 100   | -0.32618147 | -2.1730976 | 0           | 0.05525533  | 0.241      | 2450 tags=22%, list=13%, signal=25%  |
| REACTOME_CELL_CELL_COMMUNICATION                                             | 117   | -0.3087179  | -2.1290976 | 0.001949318 | 0.05662337  | 0.332      | 5648 tags=48%, list=29%, signal=67%  |
| REACTOME_METABOLISM_OF_LIPIDS_AND_LIPOPROTEINS                               | 464   | -0.22439192 | -2.106108  | 0           | 0.058394272 | 0.378      | 3769 tags=28%, list=20%, signal=33%  |
| REACTOME_AMINO_ACID_TRANSPORT_ACROSS_THE_PLASMA_MEMBRANE                     | 30    | -0.4668602  | -2.1978102 | 0           | 0.05881011  | 0.206      | 500 tags=20%, list=3%, signal=20%    |
| REACTOME_PHOSPHOLIPID_METABOLISM                                             | 191   | -0.2577392  | -2.0408244 | 0           | 0.0827846   | 0.52       | 1557 tags=16%, list=8%, signal=17%   |
| REACTOME_PRE_NOTCH_EXPRESSION_AND_PROCESSING                                 | 42    | -0.39084733 | -2.0085554 | 0.006224067 | 0.08677245  | 0.612      | 2420 tags=21%, list=12%, signal=24%  |
| REACTOME_GLYCEROPHOSPHOLIPID_BIOSYNTHESIS                                    | 82    | -0.32294306 | -2.0213702 | 0           | 0.08786809  | 0.581      | 6017 tags=46%, list=31%, signal=67%  |
| REACTOME_SLC_MEDIATED_TRANSMEMBRANE_TRANSPORT                                | 237   | -0.23156886 | -1.932178  | 0           | 0.11190721  | 0.796      | 5197 tags=40%, list=27%, signal=54%  |
| <b>GO categories</b>                                                         |       |             |            |             |             |            |                                      |
| GOEN                                                                         | 23    | -0.46264923 | -1.943206  | 0.010245902 | 0.11196677  | 0.763      | 159 tags=13%, list=1%, signal=13%    |
| REACTOME_TRANSMEMBRANE_TRANSPORT_OF_SMALL_MOLECULES                          | 405   | -0.21355653 | -1.9450761 | 0           | 0.11990413  | 0.759      | 5074 tags=37%, list=26%, signal=49%  |
| REACTOME_SIGNALING_BY_NOTCH1                                                 | 68    | -0.3213988  | -1.9105721 | 0.001992032 | 0.12129831  | 0.849      | 2629 tags=24%, list=14%, signal=27%  |
| REACTOME_ION_TRANSPORT_BY_P_TYPE_ATPASES                                     | 33    | -0.39820412 | -1.8884242 | 0.004040404 | 0.13151781  | 0.89       | 4935 tags=48%, list=25%, signal=65%  |
| REACTOME_AMINO_ACID_AND_OLIGOPEPTIDE_SLC_TRANSPORTERS                        | 48    | -0.35493466 | -1.840229  | 0.022312373 | 0.13467747  | 0.949      | 500 tags=15%, list=3%, signal=15%    |
| REACTOME_FATTY_ACID_TRIACYLGLYCEROL_AND_KETONE_BODY_METABOLISM               | 167   | -0.24466811 | -1.8455423 | 0           | 0.13622907  | 0.941      | 3376 tags=27%, list=17%, signal=32%  |
| REACTOME_NEPHRIN_INTERACTIONS                                                | 19    | -0.46701908 | -1.8476087 | 0.022222223 | 0.14170517  | 0.941      | 6030 tags=68%, list=31%, signal=99%  |
| REACTOME_CELL_JUNCTION_ORGANIZATION                                          | 76    | -0.30777881 | -1.8515095 | 0.007633588 | 0.1464167   | 0.94       | 5204 tags=43%, list=27%, signal=59%  |
| <b>GO categories</b>                                                         |       |             |            |             |             |            |                                      |
| GOEN                                                                         | 23    | -0.5224196  | -2.2090626 | 0           | 0.07202485  | 0.308      | 69 tags=13%, list=0%, signal=13%     |
| REGULATION_OF_INTRACELLULAR_TRANSPORT                                        | 24    | -0.5277135  | -2.2165177 | 0.002118644 | 0.08186571  | 0.294      | 510 tags=17%, list=0%, signal=17%    |
| REGULATION_OF_CYTOSKELETON_ORGANIZATION_AND_BIOGENESIS                       | 30    | -0.48455215 | -2.2358496 | 0.00204918  | 0.08548269  | 0.252      | 2659 tags=43%, list=14%, signal=50%  |
| REGULATION_OF_NUCLEOCYTOPLASMIC_TRANSPORT                                    | 21    | -0.5715657  | -2.250144  | 0.001984127 | 0.09755805  | 0.218      | 510 tags=19%, list=3%, signal=20%    |
| PROTEIN_AMINO_ACID_O_LINKED_GLYCOSYLATION                                    | 18    | -0.5546995  | -2.146251  | 0           | 0.10403322  | 0.456      | 222 tags=22%, list=1%, signal=22%    |
| <b>GO categories</b>                                                         |       |             |            |             |             |            |                                      |
| GOEN                                                                         | 28    | -0.5375825  | -2.3551    | 0           | 0.12036755  | 0.098      | 2531 tags=43%, list=13%, signal=49%  |
| ACTIN_CYTOSKELETON                                                           | 129   | -0.31572586 | -2.2647173 | 0           | 0.12621787  | 0.194      | 5554 tags=45%, list=29%, signal=63%  |
| INDUCTION_OF_APOPTOSIS_BY_INTRACELLULAR_SIGNALS                              | 24    | -0.46525332 | -1.9843044 | 0.004175365 | 0.137743    | 0.86       | 2306 tags=42%, list=12%, signal=47%  |
| HEMATOPOIETIN_INTERFERON_CLASSD200_DOMAIN_CYTOKINE_RECEPTOR_ACTIVITY         | 33    | -0.41156855 | -1.9901904 | 0.002012072 | 0.13927013  | 0.849      | 3670 tags=48%, list=19%, signal=60%  |
| MRNA_BINDING                                                                 | 23    | -0.4776636  | -1.9968852 | 0.006451613 | 0.14216901  | 0.839      | 724 tags=22%, list=4%, signal=23%    |
| REGULATION_OF_ORGANELLE_ORGANIZATION_AND_BIOGENESIS                          | 40    | -0.40947926 | -2.0584128 | 0.003984064 | 0.14390057  | 0.696      | 2659 tags=38%, list=14%, signal=43%  |
| NEURON_APOPTOSIS                                                             | 17    | -0.5119384  | -1.8810566 | 0.016842104 | 0.14462228  | 0.988      | 2310 tags=53%, list=12%, signal=60%  |
| REGULATION_OF_TRANSPORT                                                      | 64    | -0.32653116 | -1.8913227 | 0.002024292 | 0.14820041  | 0.982      | 562 tags=11%, list=3%, signal=11%    |
| REGULATION_OF_LYMPHOCYTE_ACTIVATION                                          | 34    | -0.3849829  | -1.8316793 | 0.008438818 | 0.14838389  | 0.987      | 4557 tags=45%, list=23%, signal=69%  |
| CORTICAL_CYTOSKELETON                                                        | 20    | -0.46843562 | -1.894355  | 0.021367522 | 0.1507651   | 0.979      | 3797 tags=55%, list=20%, signal=68%  |
| ECTODERM_DEVELOPMENT                                                         | 80    | -0.3170763  | -1.9972401 | 0           | 0.15116654  | 0.837      | 2098 tags=25%, list=11%, signal=28%  |
| EPIDERMIS_DEVELOPMENT                                                        | 71    | -0.35175005 | -2.065177  | 0           | 0.15149452  | 0.68       | 2098 tags=28%, list=11%, signal=31%  |
| DNA_REPLICATION                                                              | 100   | -0.28867814 | -1.8688245 | 0.00209205  | 0.15222315  | 0.989      | 4255 tags=40%, list=22%, signal=51%  |
| ACTIVE_TRANSMEMBRANE_TRANSPORTER_ACTIVITY                                    | 121   | -0.28027177 | -1.9327757 | 0           | 0.15247165  | 0.94       | 4647 tags=38%, list=24%, signal=50%  |
| AMINE_TRANSMEMBRANE_TRANSPORTER_ACTIVITY                                     | 40    | -0.37313342 | -1.8820982 | 0.010351967 | 0.15260532  | 0.986      | 504 tags=15%, list=3%, signal=15%    |
| <b>KEGG categories</b>                                                       |       |             |            |             |             |            |                                      |
| KEGG_P53_SIGNALING_PATHWAY                                                   | 68    | -0.4378081  | -2.5412247 | 0           | 0.00332452  | 0.003      | 2855 tags=44%, list=15%, signal=52%  |
| KEGG_VIRAL_MYOCARDIIS                                                        | 67    | -0.36388394 | -2.1888487 | 0           | 0.031080207 | 0.072      | 3526 tags=40%, list=18%, signal=45%  |
| KEGG_SPHINGOLIPID_METABOLISM                                                 | 37    | -0.4508467  | -2.2278397 | 0           | 0.03139731  | 0.051      | 446 tags=19%, list=2%, signal=21%    |
| KEGG_GLYCEROPHOSPHOLIPID_METABOLISM                                          | 77    | -0.34598848 | -2.087179  | 0           | 0.036613315 | 0.141      | 1252 tags=19%, list=6%, signal=19%   |
| KEGG_THYROID_CANCER                                                          | 29    | -0.47040305 | -2.0984156 | 0           | 0.041465405 | 0.131      | 882 tags=24%, list=5%, signal=25%    |
| KEGG_BLADDER_CANCER                                                          | 42    | -0.39755467 | -2.040534  | 0.002012072 | 0.04370223  | 0.193      | 790 tags=17%, list=4%, signal=17%    |
| KEGG_STEROID_BIOSYNTHESIS                                                    | 17    | -0.51668316 | -1.9525889 | 0.008333334 | 0.07016209  | 0.325      | 1471 tags=35%, list=8%, signal=38%   |
| KEGG_CELL_ADHESION_MOLECULES_CAMS                                            | 129   | -0.25672847 | -1.7782373 | 0.004       | 0.10134665  | 0.703      | 5139 tags=40%, list=27%, signal=54%  |
| KEGG_FOCAL_ADHESION                                                          | 196   | -0.23636789 | -1.8736428 | 0.002       | 0.10434793  | 0.481      | 5200 tags=42%, list=27%, signal=60%  |
| KEGG_PATHOGENIC_ESCHERICHIA_COLI_INFECTION                                   | 55    | -0.3288918  | -1.8576694 | 0.004123712 | 0.10457591  | 0.525      | 4687 tags=42%, list=24%, signal=55%  |
| KEGG_CHRONIC_MYELOID_LEUKEMIA                                                | 72    | -0.29088187 | -1.7797433 | 0.008080808 | 0.10761795  | 0.7        | 6451 tags=53%, list=33%, signal=79%  |
| KEGG_LEUKOCYTE_TRANSENDOTHELIAL_MIGRATION                                    | 114   | -0.26647222 | -1.802328  | 0.001984127 | 0.10966305  | 0.643      | 5229 tags=45%, list=27%, signal=61%  |
| KEGG_LYSOSOME                                                                | 121   | -0.25627694 | -1.7860723 | 0.002070393 | 0.11153178  | 0.683      | 6920 tags=50%, list=36%, signal=78%  |
| KEGG_RENAL_CELL_CARCINOMA                                                    | 70    | -0.2907536  | -1.7463734 | 0.001869159 | 0.11319623  | 0.76       | 1176 tags=17%, list=6%, signal=18%   |
| KEGG_MTOR_SIGNALING_PATHWAY                                                  | 51    | -0.32329378 | -1.7318786 | 0.016701462 | 0.11439266  | 0.78       | 2217 tags=24%, list=11%, signal=26%  |
| KEGG_NOTCH_SIGNALING_PATHWAY                                                 | 47    | -0.32678718 | -1.7219028 | 0.012219959 | 0.1155542   | 0.804      | 1191 tags=15%, list=6%, signal=16%   |
| KEGG_ECM_RECEPTOR_INTERACTION                                                | 83    | -0.28989404 | -1.8074018 | 0.005791506 | 0.116981285 | 0.636      | 2353 tags=25%, list=12%, signal=29%  |
| KEGG_PATHWAYS_IN_CANCER                                                      | 323   | -0.19531394 | -1.7094687 | 0.001818182 | 0.117387086 | 0.826      | 2317 tags=21%, list=12%, signal=23%  |
| KEGG_GLYCEROLIPID_METABOLISM                                                 | 49    | -0.34926337 | -1.8173573 | 0.014736842 | 0.12233589  | 0.617      | 1452 tags=22%, list=7%, signal=24%   |
| KEGG_ADHERENS_JUNCTION                                                       | 73    | -0.27878734 | -1.6785802 | 0.018828452 | 0.12639788  | 0.876      | 3626 tags=34%, list=19%, signal=42%  |
| <b>mRNA Targets</b>                                                          |       |             |            |             |             |            |                                      |
| TSCANALL                                                                     | 10729 | -0.1433729  | -1.894173  | 0           | 0.006941582 | 0.054      | 4206 tags=24%, list=22%, signal=14%  |

Sets upregulated following eIF4A1 knockdown

|                                                                                            | SIZE | ES         | NES       | NOM p-val   | FDR q-val   | FWER p-val | RANK AT MAX EADING EDGE              |
|--------------------------------------------------------------------------------------------|------|------------|-----------|-------------|-------------|------------|--------------------------------------|
| <b>Biocarta categories</b>                                                                 |      |            |           |             |             |            |                                      |
| BIOCARTA_GSK3_PATHWAY                                                                      | 27   | 0.44091013 | 1.9561715 | 0.005825243 | 0.051351752 | 0.28       | 2949 tags=41%, list=15%, signal=48%  |
| BIOCARTA_PITX2_PATHWAY                                                                     | 15   | 0.55091083 | 2.004263  | 0.002004008 | 0.08018893  | 0.196      | 1338 tags=27%, list=7%, signal=29%   |
| BIOCARTA_MAPK_PATHWAY                                                                      | 85   | 0.30774373 | 1.9661897 | 0           | 0.05995498  | 0.262      | 2351 tags=29%, list=12%, signal=33%  |
| BIOCARTA_LAIR_PATHWAY                                                                      | 17   | 0.54108113 | 2.036683  | 0.003703704 | 0.06967147  | 0.161      | 4176 tags=65%, list=22%, signal=82%  |
| BIOCARTA_PROTEASOME_PATHWAY                                                                | 28   | 0.44825545 | 2.055028  | 0.001945525 | 0.1197708   | 0.14       | 1512 tags=32%, list=8%, signal=35%   |
| <b>Reactome categories</b>                                                                 |      |            |           |             |             |            |                                      |
| REACTOME_METABOLISM_OF_MRNA                                                                | 208  | 0.3081843  | 2.5229495 | 0           | 9.22E-04    | 0.001      | 1512 tags=22%, list=8%, signal=24%   |
| REACTOME_METABOLISM_OF_RNA                                                                 | 253  | 0.27851424 | 2.3438802 | 0           | 0.011401352 | 0.023      | 1167 tags=18%, list=6%, signal=19%   |
| REACTOME_NONSENSE_MEDIATED_DECAY_ENHANCED_BY_THE_EXON_JUNCTION_COMPLEX                     | 105  | 0.32517275 | 2.2775497 | 0           | 0.015829688 | 0.046      | 901 tags=17%, list=5%, signal=18%    |
| REACTOME_ASSEMBLY_OF_THE_PRE_REPLICATIVE_COMPLEX                                           | 63   | 0.3372201  | 2.0847075 | 0.003838772 | 0.024177086 | 0.236      | 4001 tags=38%, list=21%, signal=48%  |
| REACTOME_OLFACTORY_SIGNALING_PATHWAY                                                       | 194  | 0.27149022 | 2.1973305 | 0           | 0.024698887 | 0.096      | 8305 tags=69%, list=43%, signal=120% |
| REACTOME_PEPTIDE_CHAIN_ELONGATION                                                          | 84   | 0.32367435 | 2.090716  | 0           | 0.025808588 | 0.229      | 901 tags=17%, list=5%, signal=17%    |
| REACTOME_JNK_C_JUN_KINASES_PHOSPHORYLATION_AND_ACTIVATION_MEDIATED_BY_ACTIVATED_HUMAN_TAK1 | 16   | 0.55516016 | 2.0658596 | 0.007407407 | 0.026316946 | 0.276      | 5949 tags=75%, list=31%, signal=108% |
| REACTOME_CDT1_ASSOCIATION_WITH_THE_CDC6_ORC_ORIGIN_COMPLEX                                 | 54   | 0.3750361  | 2.17059   | 0           | 0.02681107  | 0.128      | 4001 tags=41%, list=21%, signal=51%  |
| REACTOME_GLUTATHIONE_CONJUGATION                                                           | 23   | 0.49533388 | 2.0916848 | 0           | 0.028570406 | 0.229      | 5238 tags=70%, list=27%, signal=95%  |
| REACTOME_RNA_POL_L_TRANSCRIPTION_TERMINATION                                               | 20   | 0.5096392  | 2.1040525 | 0.001879699 | 0.028662553 | 0.204      | 1641 tags=40%, list=8%, signal=44%   |
| REACTOME_CDK_MEDIATED_PHOSPHORYLATION_AND_REMOVAL_OF_CDC6                                  | 46   | 0.39023116 | 2.109584  | 0           | 0.031597346 | 0.198      | 5991 tags=50%, list=31%, signal=72%  |
| REACTOME_INFLUENZA_VIRAL_RNA_TRANSCRIPTION_AND_REPLICATION                                 | 100  | 0.29314867 | 1.9781009 | 0           | 0.033025455 | 0.49       | 901 tags=16%, list=5%, signal=17%    |
| REACTOME_MAP_KINASE_ACTIVATION_IN_TLR_CASCADE                                              | 49   | 0.3876727  | 2.126775  | 0.001984127 | 0.033369616 | 0.179      | 5949 tags=57%, list=31%, signal=82%  |
| REACTOME_VIF_MEDIATED_DEGRADATION_OF_APOBEC3G                                              | 4</  |            |           |             |             |            |                                      |

|                                                             |       |             |           |             |             |       |                                      |
|-------------------------------------------------------------|-------|-------------|-----------|-------------|-------------|-------|--------------------------------------|
| STRUCTURAL_CONSTITUENT_OF_RIBOSOME                          | 79    | 0.37299684  | 2.3721433 | 0           | 0.018444264 | 0.022 | 964 tags=20%, list=5%, signal=21%    |
| SMALL_NUCLEAR_RIBONUCLEOPROTEIN_COMPLEX                     | 22    | 0.52627647  | 2.1875756 | 0           | 0.019588683 | 0.159 | 357 tags=18%, list=2%, signal=19%    |
| MITOCHONDRIAL_INNER_MEMBRANE                                | 66    | 0.3924545   | 2.3291326 | 0           | 0.020505786 | 0.05  | 2010 tags=30%, list=10%, signal=34%  |
| ORGANELLE_INNER_MEMBRANE                                    | 74    | 0.3552572   | 2.1936874 | 0           | 0.02177734  | 0.152 | 2010 tags=28%, list=10%, signal=32%  |
| MITOCHONDRIAL_PART                                          | 140   | 0.2832095   | 2.0633895 | 0           | 0.04590445  | 0.436 | 2561 tags=27%, list=13%, signal=31%  |
| NUCLEOLAR_PART                                              | 17    | 0.53578246  | 2.0710597 | 0.007722008 | 0.047790132 | 0.413 | 545 tags=29%, list=3%, signal=30%    |
| RIBONUCLEOPROTEIN_COMPLEX                                   | 141   | 0.26861376  | 2.0103428 | 0           | 0.0658992   | 0.595 | 1110 tags=15%, list=6%, signal=16%   |
| MITOCHONDRION                                               | 335   | 0.21580894  | 1.9687381 | 0           | 0.08563331  | 0.73  | 2102 tags=21%, list=11%, signal=23%  |
| HISTONE_DEACETYLASE_COMPLEX                                 | 20    | 0.4627358   | 1.915685  | 0           | 0.09782719  | 0.873 | 6387 tags=70%, list=33%, signal=104% |
| METHYLTRANSFERASE_ACTIVITY                                  | 36    | 0.39108592  | 1.9164327 | 0.001901141 | 0.103223994 | 0.869 | 2271 tags=33%, list=12%, signal=38%  |
| RECEPTOR_SIGNALING_PROTEIN_SERINE_THREONINE_KINASE_ACTIVITY | 33    | 0.40348503  | 1.9347781 | 0.005952381 | 0.10359031  | 0.839 | 1236 tags=24%, list=6%, signal=26%   |
| TRANSFERASE_ACTIVITY_TRANSFERRING_ONE_CARBON_GROUPS         | 37    | 0.37840745  | 1.9244865 | 0.005813954 | 0.10360596  | 0.859 | 2271 tags=32%, list=12%, signal=37%  |
| TRANSLATION                                                 | 179   | 0.23443417  | 1.8795023 | 0.001949318 | 0.12035544  | 0.928 | 3679 tags=28%, list=19%, signal=35%  |
| PROTEIN_SERINE_THREONINE_KINASE_ACTIVITY                    | 200   | 0.229881    | 1.8707961 | 0           | 0.12143372  | 0.942 | 3818 tags=31%, list=20%, signal=38%  |
| TRANSCRIPTION_REPRESSOR_ACTIVITY                            | 148   | 0.24085638  | 1.8375266 | 0           | 0.148141    | 0.963 | 1511 tags=17%, list=8%, signal=18%   |
| <b>KEGG categories</b>                                      |       |             |           |             |             |       |                                      |
| KEGG_PROTEASOME                                             | 44    | 0.39340857  | 2.1157224 | 0.001872659 | 0.01766739  | 0.067 | 1512 tags=30%, list=8%, signal=32%   |
| KEGG_OXIDATIVE_PHOSPHORYLATION                              | 115   | 0.30659038  | 2.1783392 | 0           | 0.018358644 | 0.047 | 2010 tags=25%, list=10%, signal=28%  |
| KEGG_RNA_POLYMERASE                                         | 29    | 0.46898487  | 2.1843812 | 0.003773585 | 0.035198532 | 0.045 | 847 tags=28%, list=4%, signal=29%    |
| KEGG_RIBOSOME                                               | 86    | 0.29196167  | 1.9068103 | 0           | 0.06488873  | 0.284 | 901 tags=15%, list=5%, signal=16%    |
| KEGG_HUNTINGTONS_DISEASE                                    | 170   | 0.23834488  | 1.8654752 | 0           | 0.06960748  | 0.361 | 1688 tags=21%, list=9%, signal=23%   |
| KEGG_OLFACTORY_TRANSDUCTION                                 | 246   | 0.2158295   | 1.8294756 | 0           | 0.07680218  | 0.444 | 8238 tags=64%, list=42%, signal=110% |
| KEGG_PARKINSONS_DISEASE                                     | 112   | 0.25967684  | 1.7955871 | 0.006198347 | 0.082040206 | 0.531 | 3663 tags=30%, list=19%, signal=37%  |
| KEGG_BASAL_CELL_CARCINOMA                                   | 55    | 0.31662443  | 1.7745699 | 0.006036217 | 0.085056245 | 0.589 | 785 tags=15%, list=4%, signal=15%    |
| KEGG_PURINE_METABOLISM                                      | 155   | 0.23145445  | 1.7556967 | 0.002087683 | 0.08526107  | 0.639 | 4471 tags=32%, list=23%, signal=41%  |
| KEGG_PYRIMIDINE_METABOLISM                                  | 95    | 0.25966406  | 1.7140204 | 0.00625     | 0.091283806 | 0.732 | 847 tags=15%, list=4%, signal=15%    |
| KEGG_SPLICEOSOME                                            | 122   | 0.23903011  | 1.7262952 | 0.00591716  | 0.09319797  | 0.709 | 1397 tags=14%, list=7%, signal=15%   |
| KEGG_PANTOTHENATE_AND_COA_BIOSYNTHESIS                      | 16    | 0.43753055  | 1.641037  | 0.044198897 | 0.13326482  | 0.88  | 7199 tags=69%, list=37%, signal=109% |
| KEGG_NUCLEOTIDE_EXCISION_REPAIR                             | 44    | 0.29050308  | 1.545092  | 0.056285176 | 0.20406431  | 0.973 | 3322 tags=68%, list=48%, signal=131% |
| KEGG_PROXIMAL_TUBULE_BICARBONATE_RECLAMATION                | 22    | 0.37140813  | 1.5542997 | 0.060037524 | 0.20595537  | 0.966 | 6604 tags=55%, list=34%, signal=83%  |
| KEGG_CYTOSOLIC_DNA_SENSING_PATHWAY                          | 56    | 0.26836112  | 1.5158098 | 0.060491495 | 0.22371818  | 0.986 | 8580 tags=64%, list=44%, signal=115% |
| KEGG_RIG_I_LIKE_RECEPTOR_SIGNALING_PATHWAY                  | 70    | 0.24301048  | 1.4873179 | 0.036893204 | 0.2475609   | 0.992 | 7947 tags=56%, list=41%, signal=94%  |
| KEGG_ONE_CARBON_POOL_BY_FOLATE                              | 17    | 0.3650509   | 1.4104551 | 0.11676083  | 0.24797313  | 0.999 | 1148 tags=18%, list=9%, signal=19%   |
| <b>miRNA Targets</b>                                        |       |             |           |             |             |       |                                      |
| TSCAN.ALL                                                   | 10729 | -0.14179148 | -1.782787 | 0           | 0.007799148 | 0.133 | 3316 tags=20%, list=17%, signal=11%  |
